# Supplementary material for: A stereo-controlled access to functionalized macrolactams via an aza-Claisen rearrangement
Source: Royal Society of Chemistry journal article supplement (doi:10.1039/c1ob06733h), 2011-10-25

## **A Stereocontrolled Access to Functionalized Macrolactams via Aza-Claisen Rearrangement**

**Young-Ger Suh,\*<sup>a</sup> Yong-Sil Lee,<sup>a</sup> Seok-Ho Kim,<sup>b</sup> Jae-Kyung Jung,<sup>c</sup>**

**Hwayoung Yun,<sup>a</sup> Jaebong Jang,<sup>a</sup> Nam-Jung Kim<sup>a</sup> and Jong-Wha Jung\*<sup>a</sup>**

*<sup>a</sup>College of Pharmacy, Seoul National University, Gwanakro 599, Gwanak-Gu, Seoul 151-742, Korea, <sup>b</sup>Department of Pharmacy, College of Pharmacy, CHA University, Haeryongro 120, Pocheon-si, Gyeonggi-do, 487-010, Korea, <sup>c</sup>College of Pharmacy, Chungbuk National University, Cheongju 361-763, Korea*

E-mail: ygsuh@snu.ac.kr

### **Supporting Information**

**<sup>1</sup>H- and <sup>13</sup>C-NMR Spectra**

## $^1\text{H-NMR}$ and $^{13}\text{C-NMR}$ Spectra

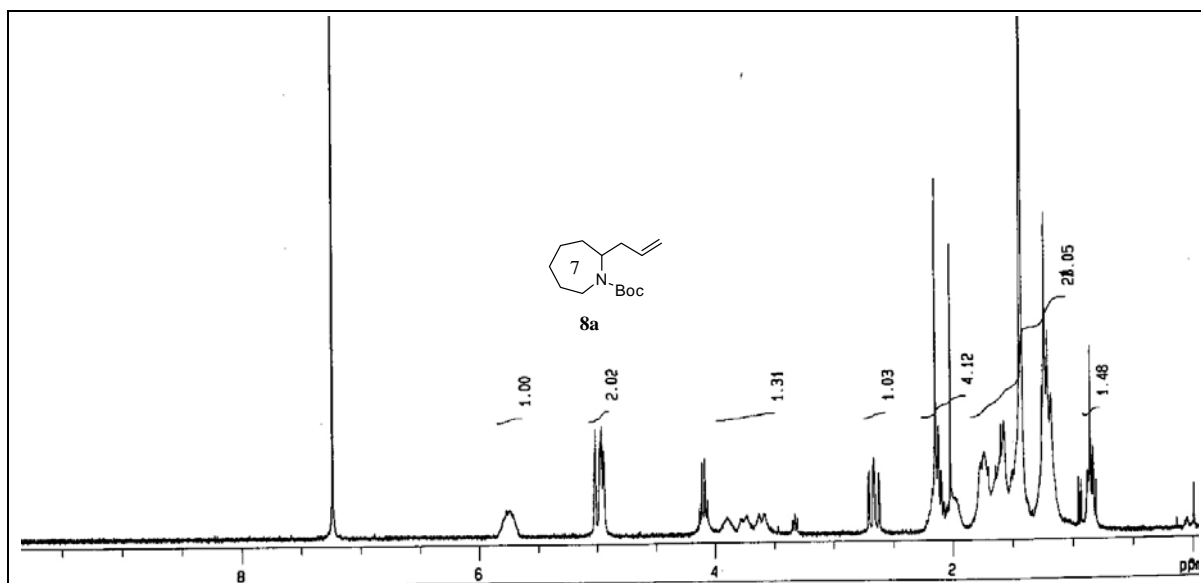

▲  $^1\text{H-NMR}$  (300 MHz,  $\text{CDCl}_3$ )

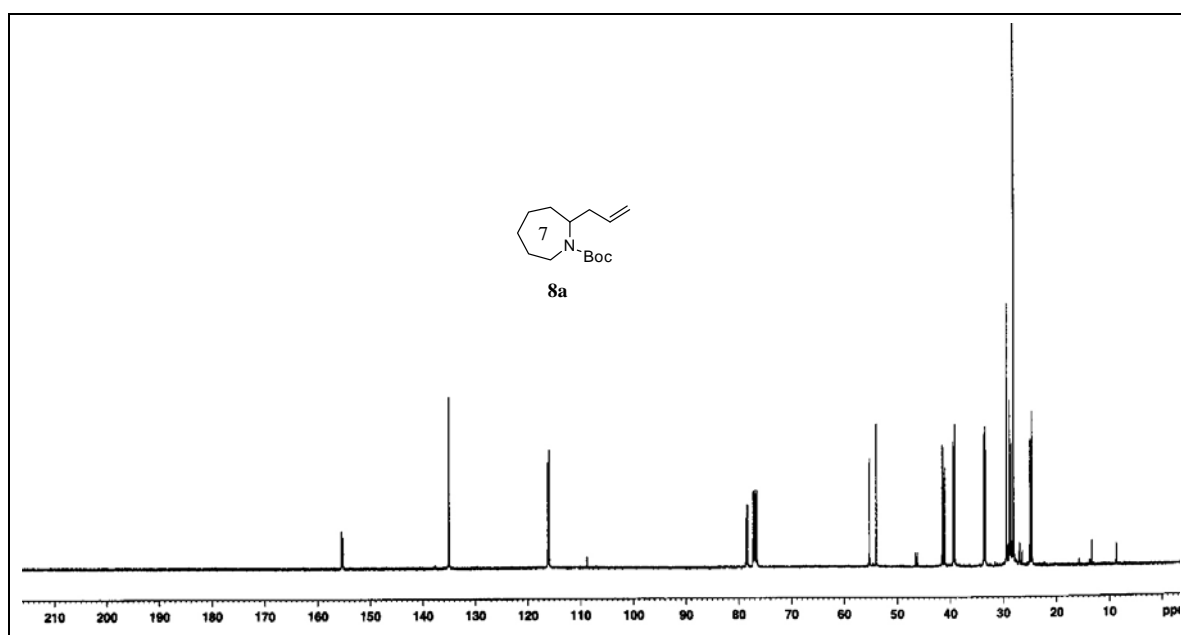

▲  $^{13}\text{C-NMR}$  (100 MHz,  $\text{CDCl}_3$ )

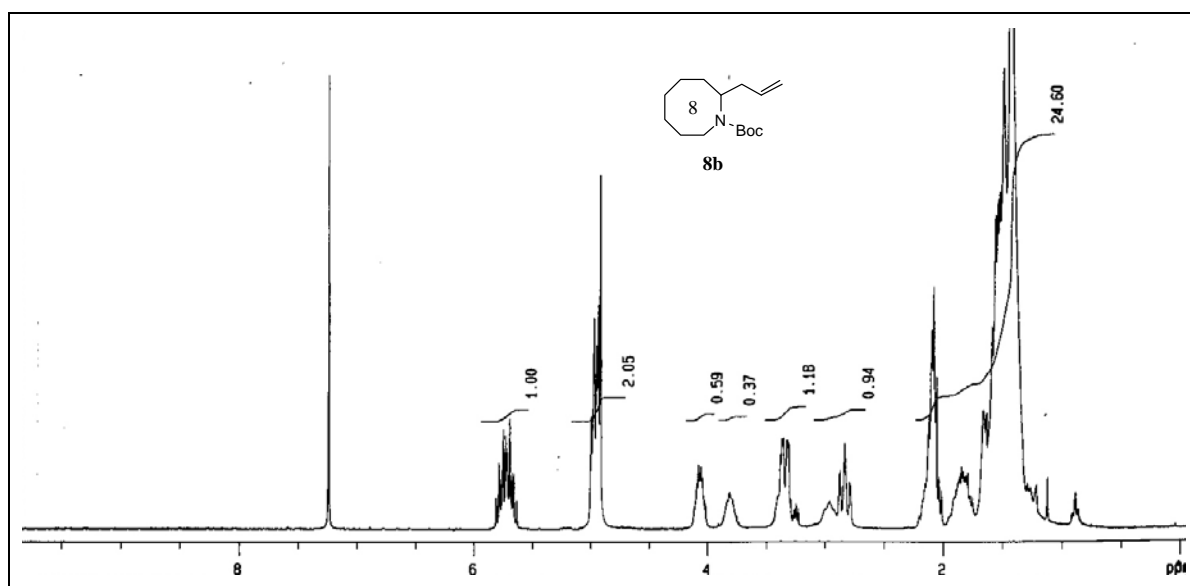

▲ <sup>1</sup>H-NMR (300 MHz, CDCl<sub>3</sub>)

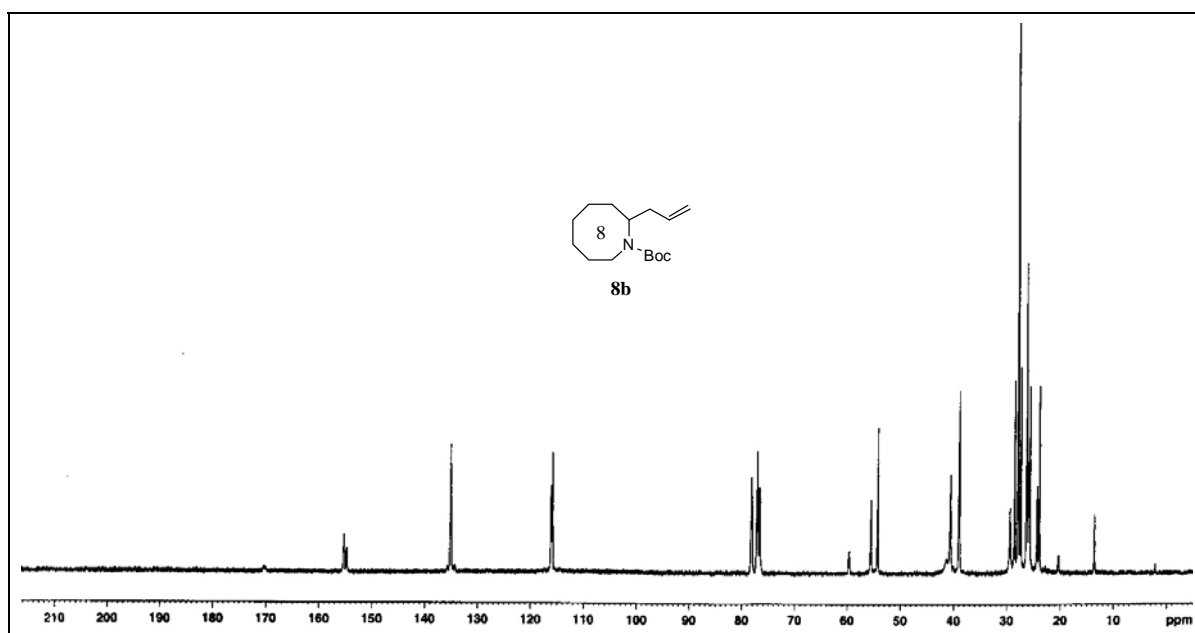

▲ <sup>13</sup>C-NMR (100 MHz, CDCl<sub>3</sub>)

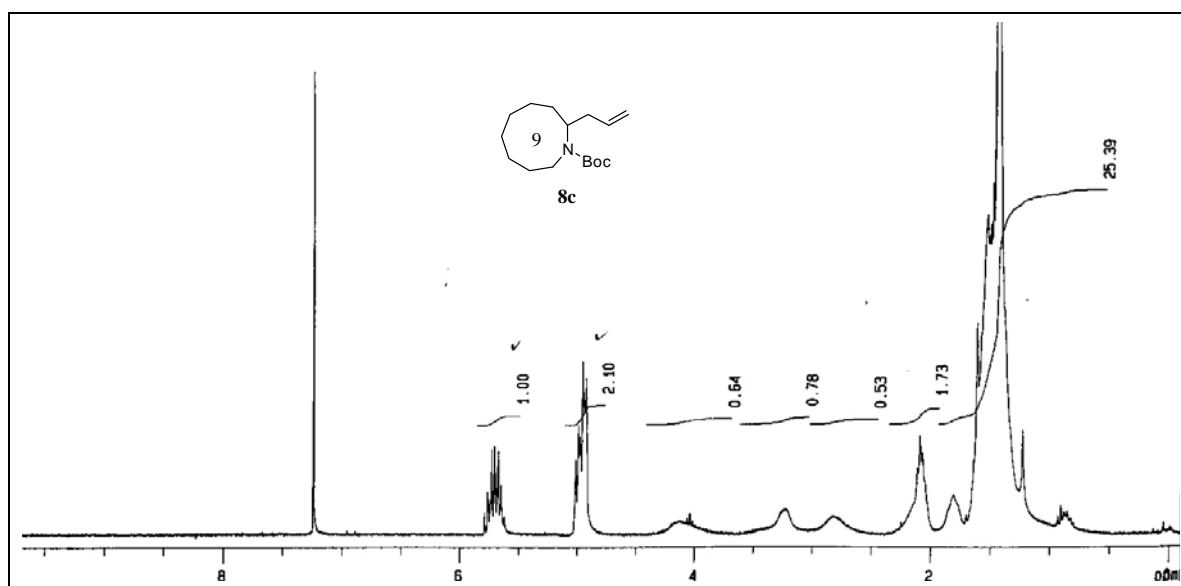

▲ <sup>1</sup>H-NMR (300 MHz, CDCl<sub>3</sub>)

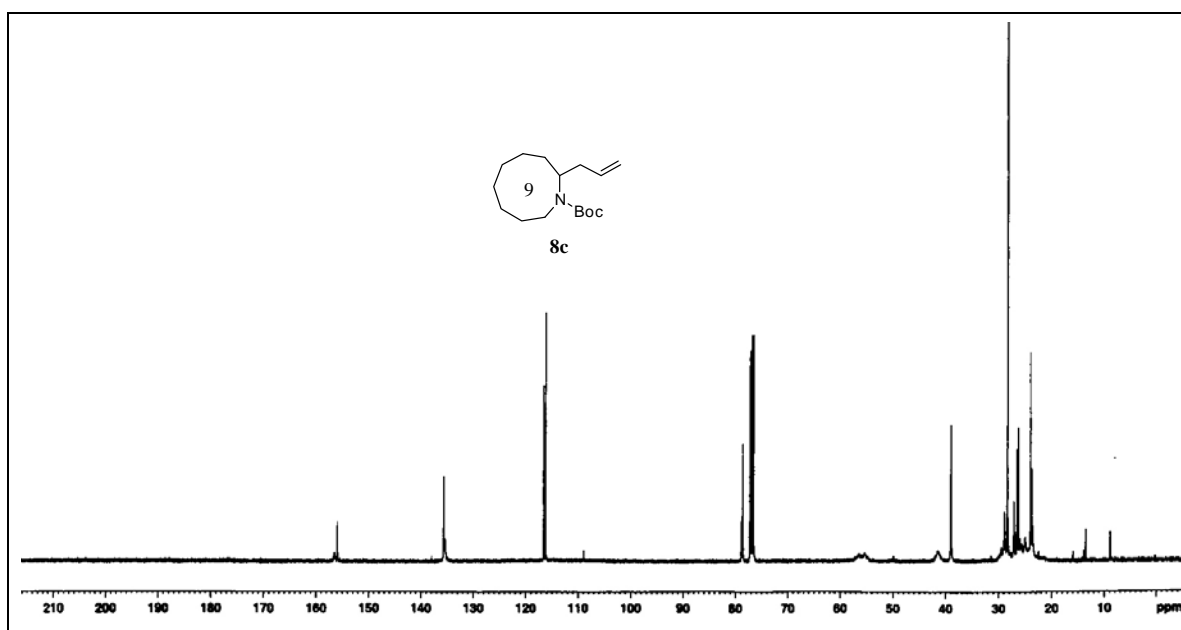

▲ <sup>13</sup>C-NMR (100 MHz, CDCl<sub>3</sub>)

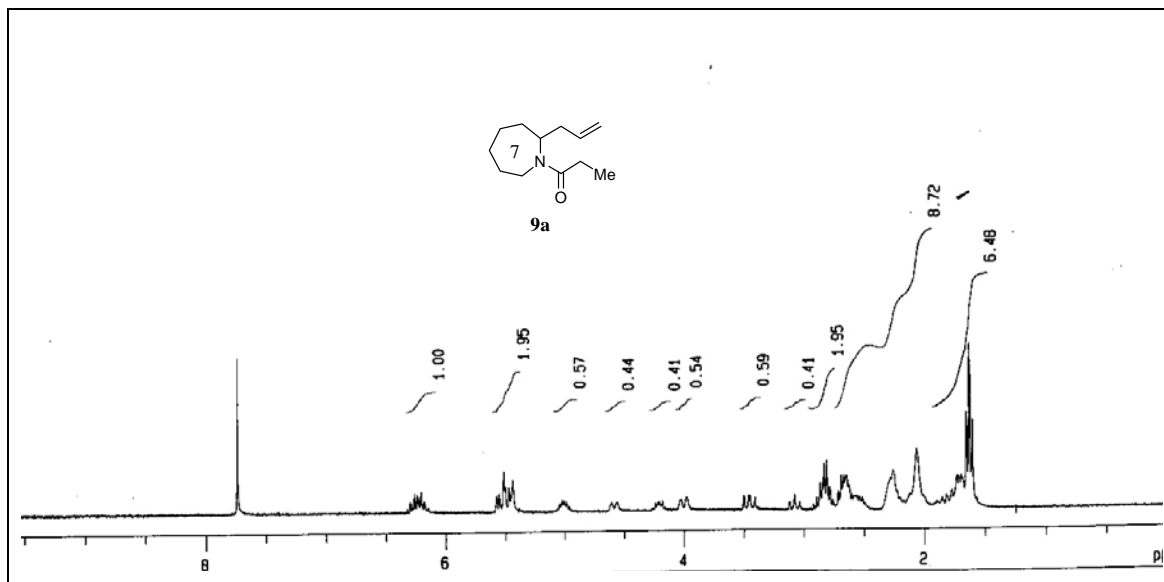

▲ <sup>1</sup>H-NMR (300 MHz, CDCl<sub>3</sub>)

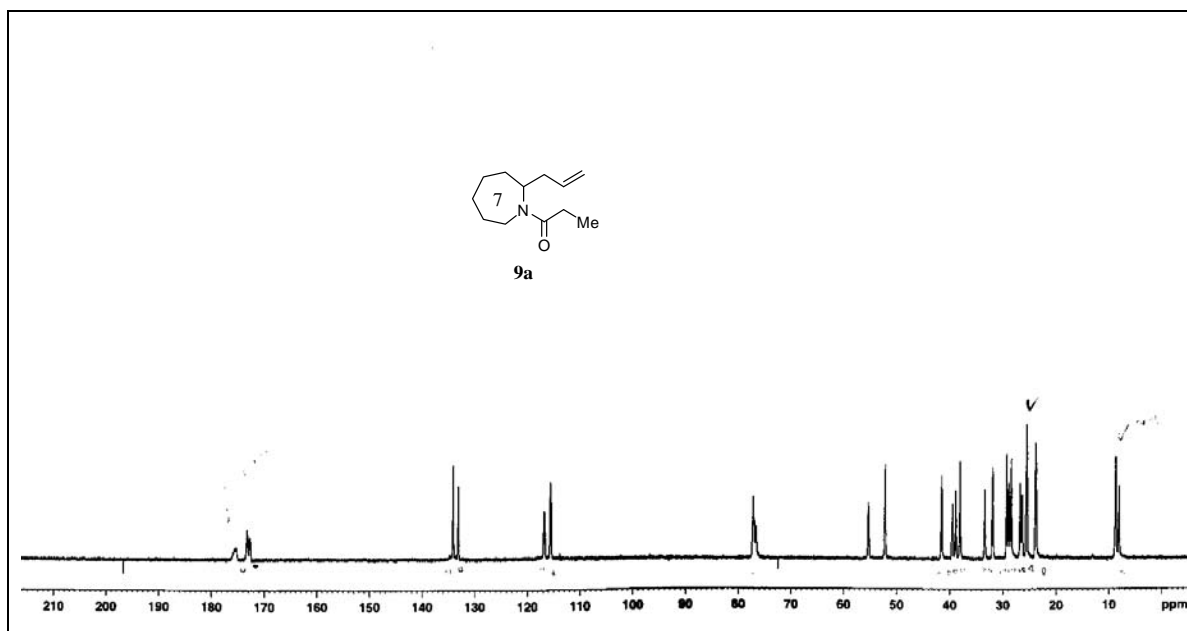

▲ <sup>13</sup>C-NMR (100 MHz, CDCl<sub>3</sub>)

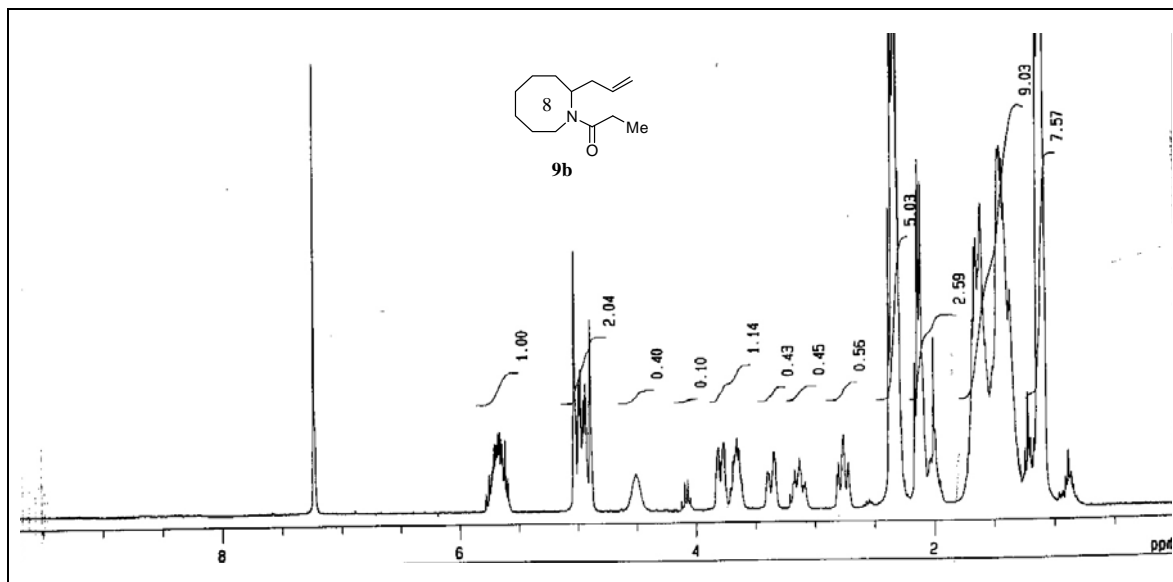

▲ <sup>1</sup>H-NMR (300 MHz, CDCl<sub>3</sub>)

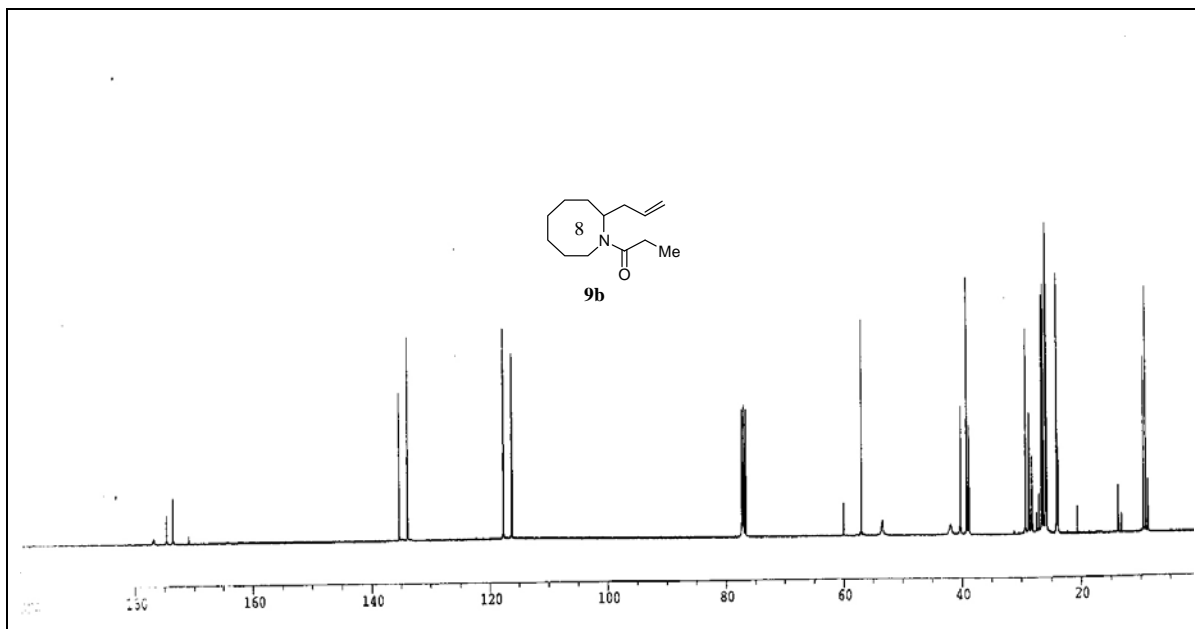

▲ <sup>13</sup>C-NMR (100 MHz, CDCl<sub>3</sub>)

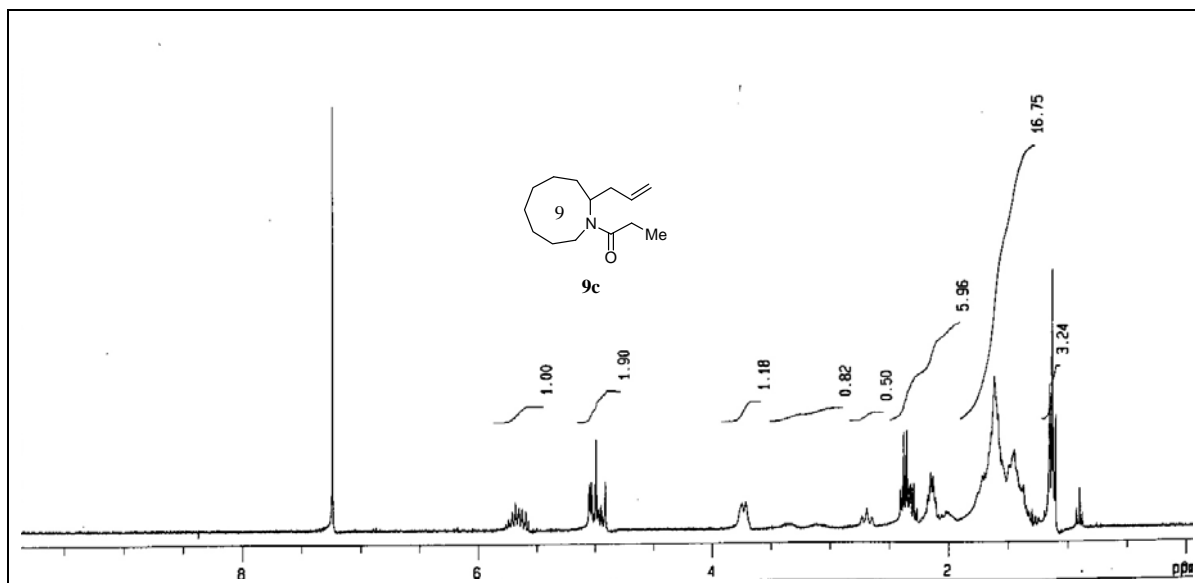

▲ <sup>1</sup>H-NMR (300 MHz, CDCl<sub>3</sub>)

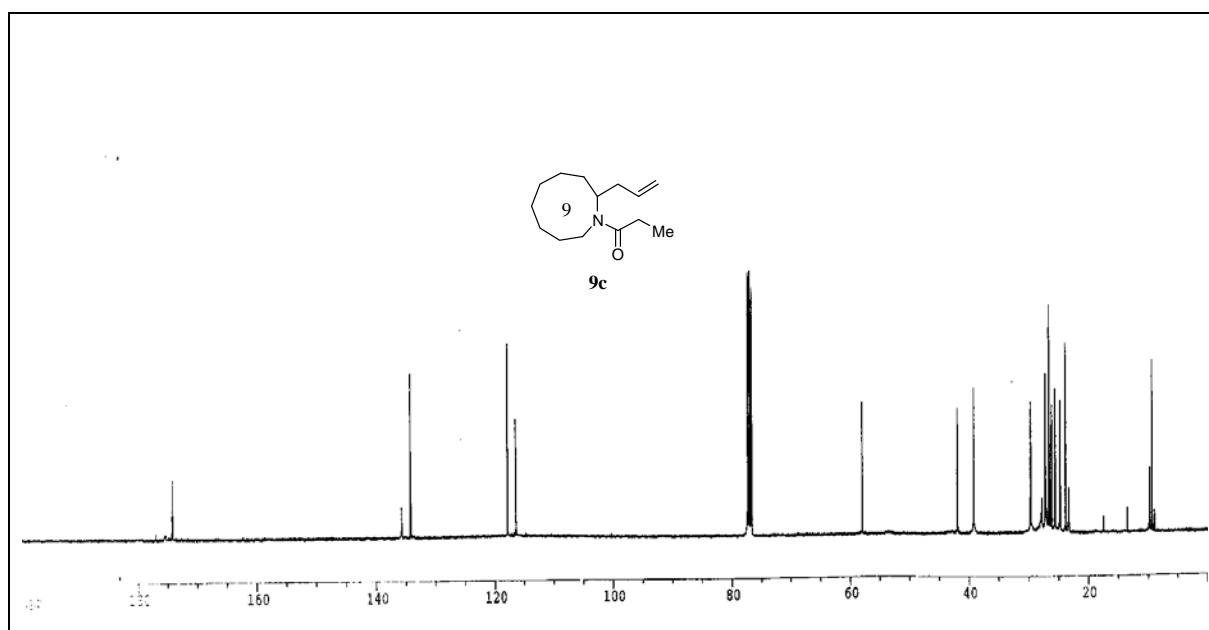

▲ <sup>13</sup>C-NMR (100 MHz, CDCl<sub>3</sub>)

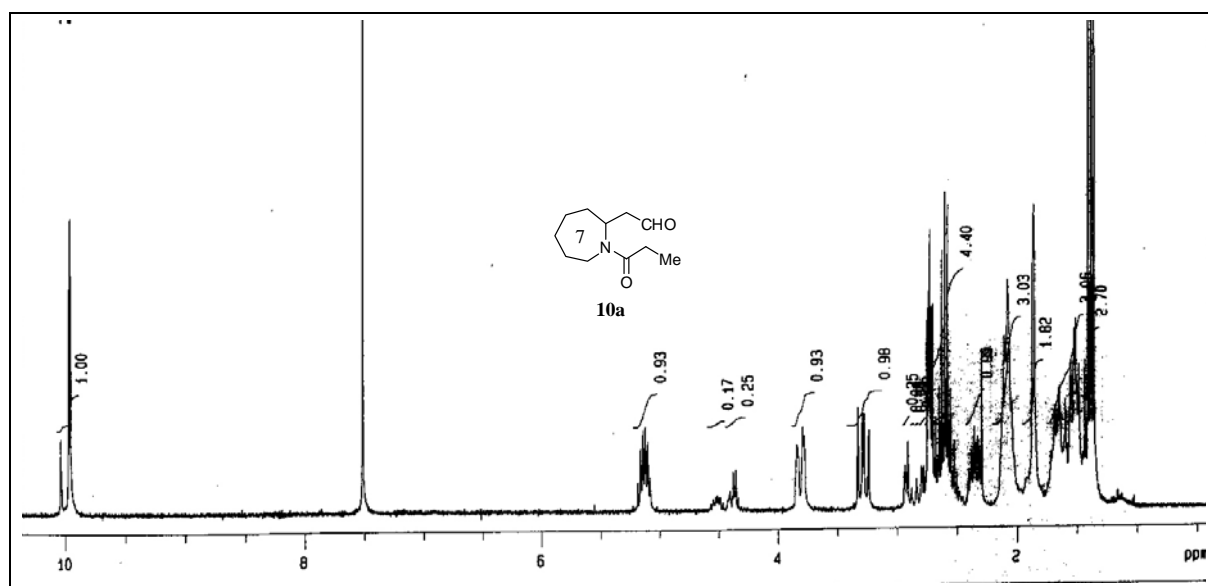

▲  $^1\text{H-NMR}$  (300 MHz,  $\text{CDCl}_3$ )

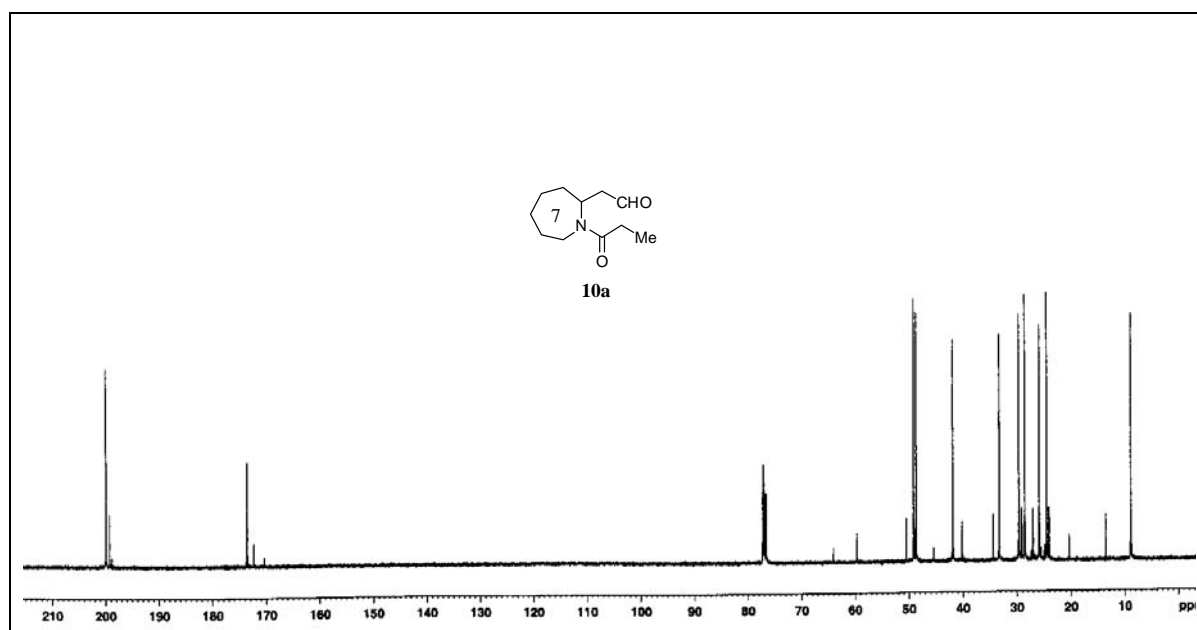

▲  $^{13}\text{C-NMR}$  (100 MHz,  $\text{CDCl}_3$ )



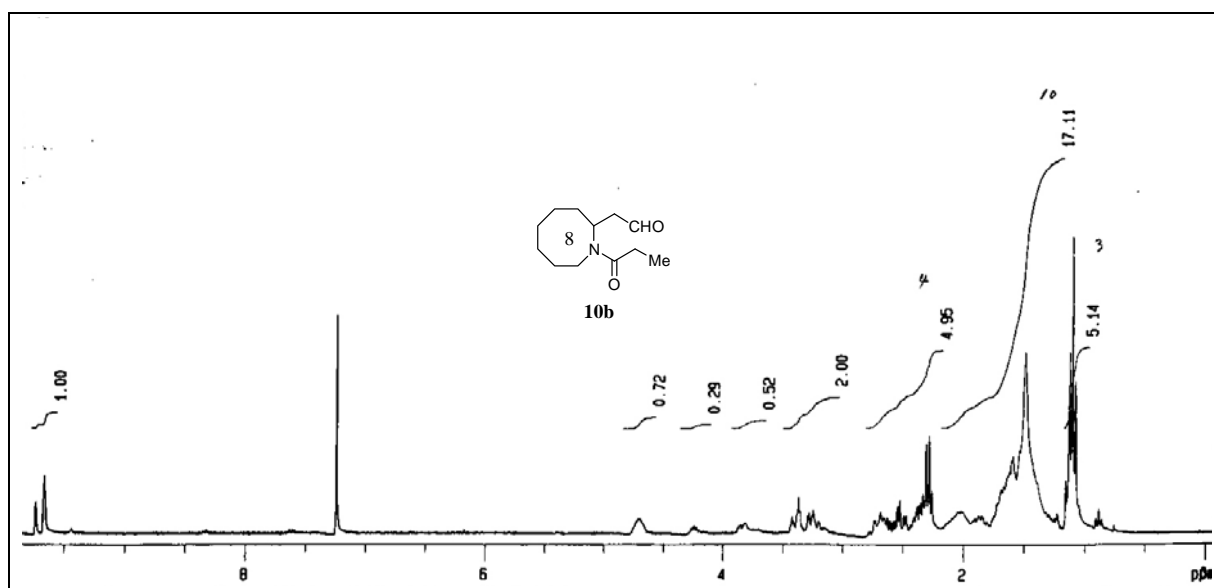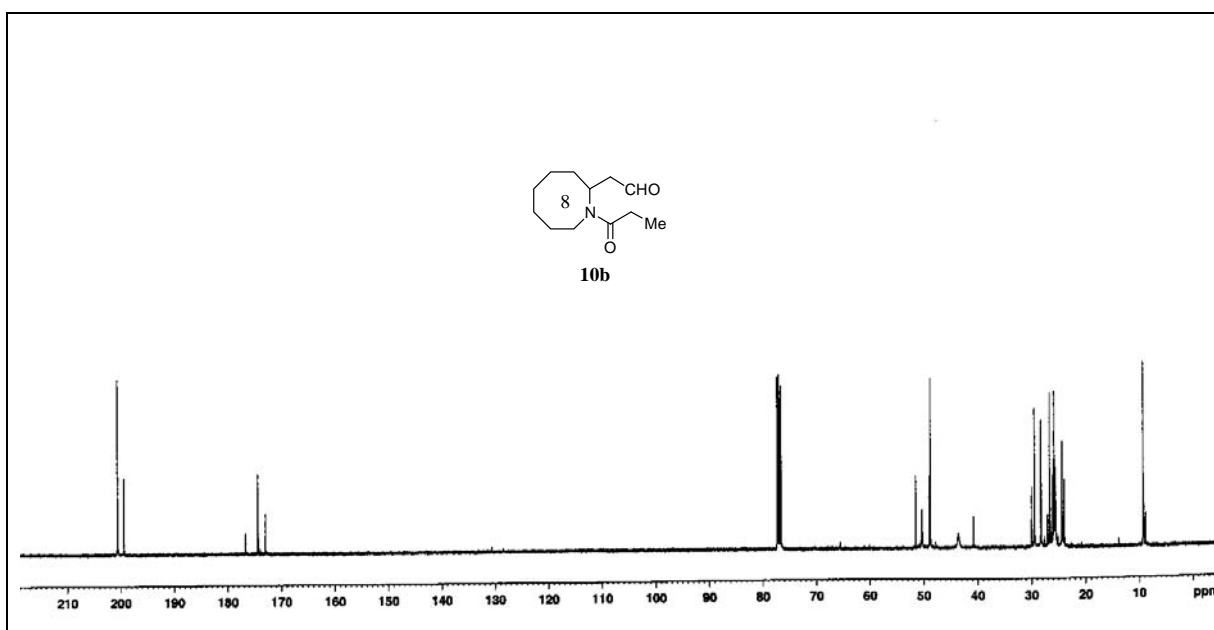

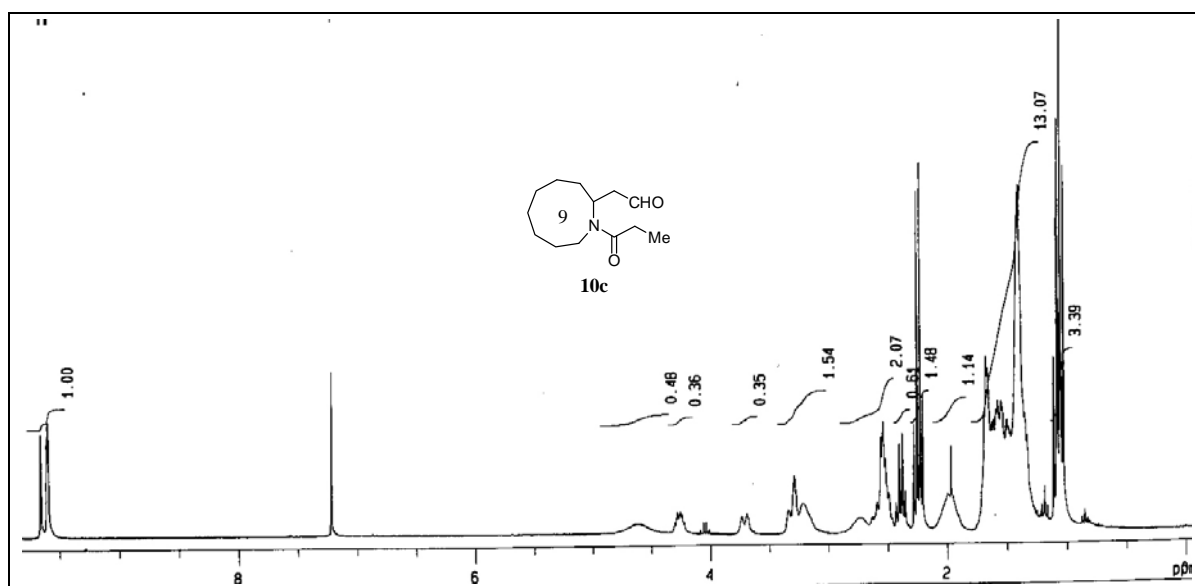

▲  $^1\text{H-NMR}$  (300 MHz,  $\text{CDCl}_3$ )

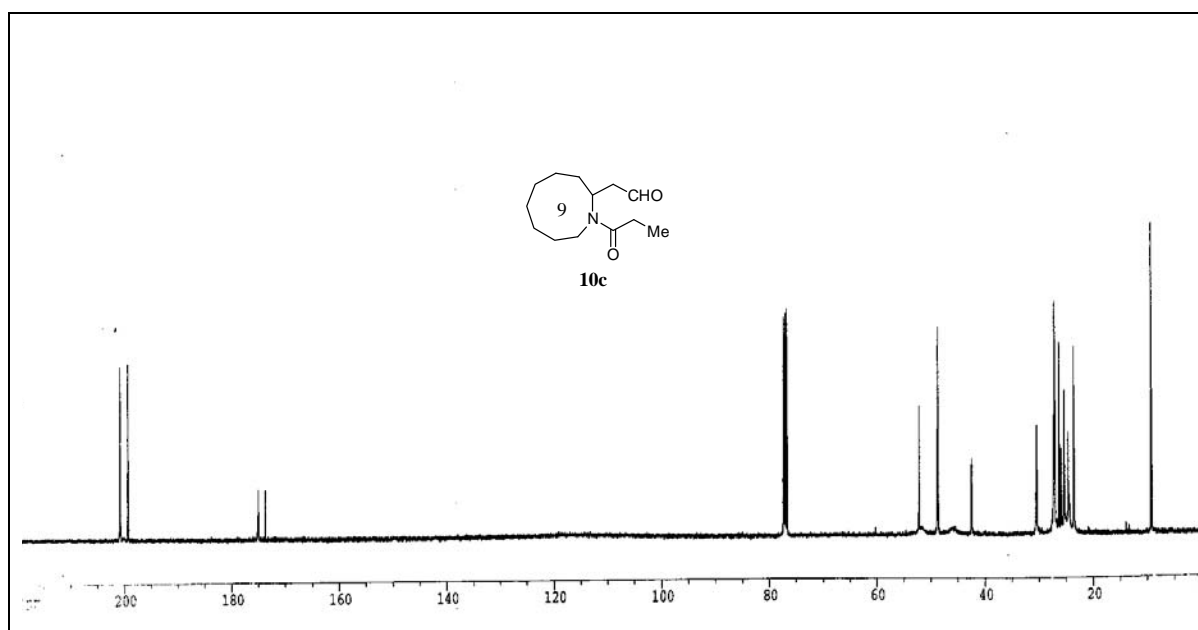

▲  $^{13}\text{C-NMR}$  (100 MHz,  $\text{CDCl}_3$ )

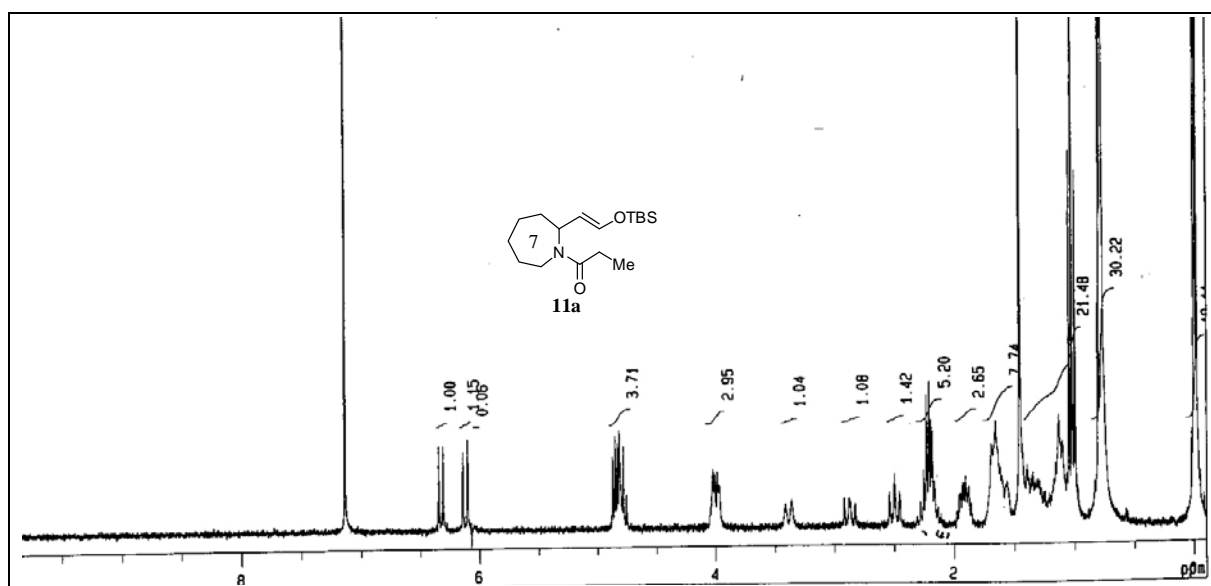

▲ <sup>1</sup>H-NMR (300 MHz, CDCl<sub>3</sub>)

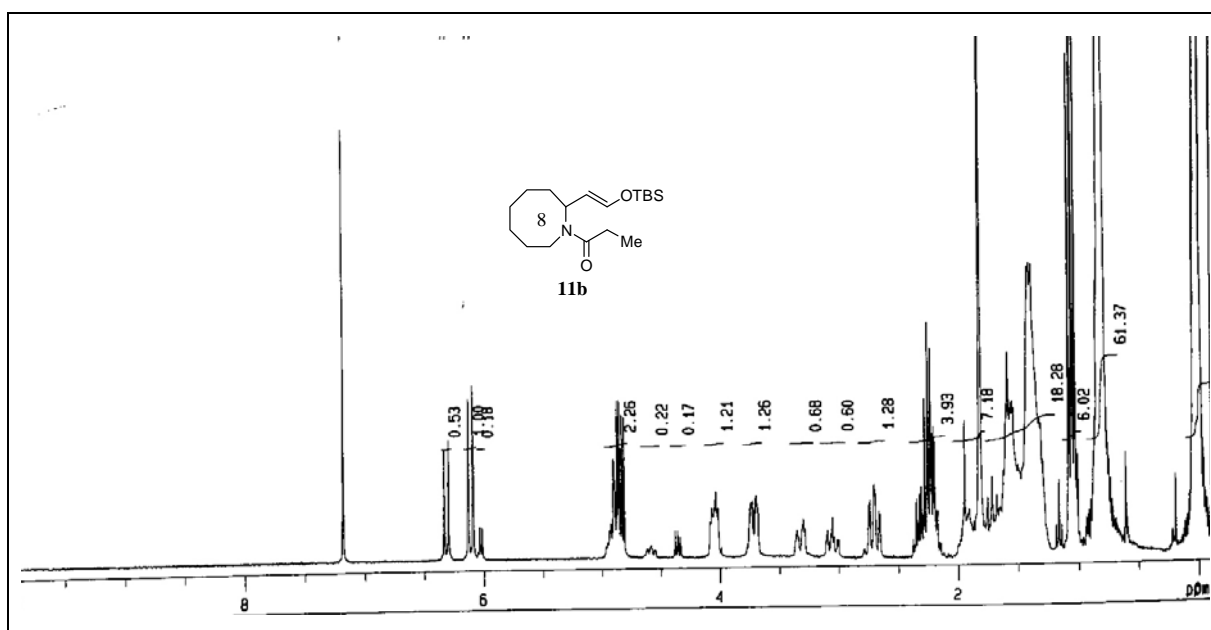

▲ <sup>1</sup>H-NMR (300 MHz, CDCl<sub>3</sub>)

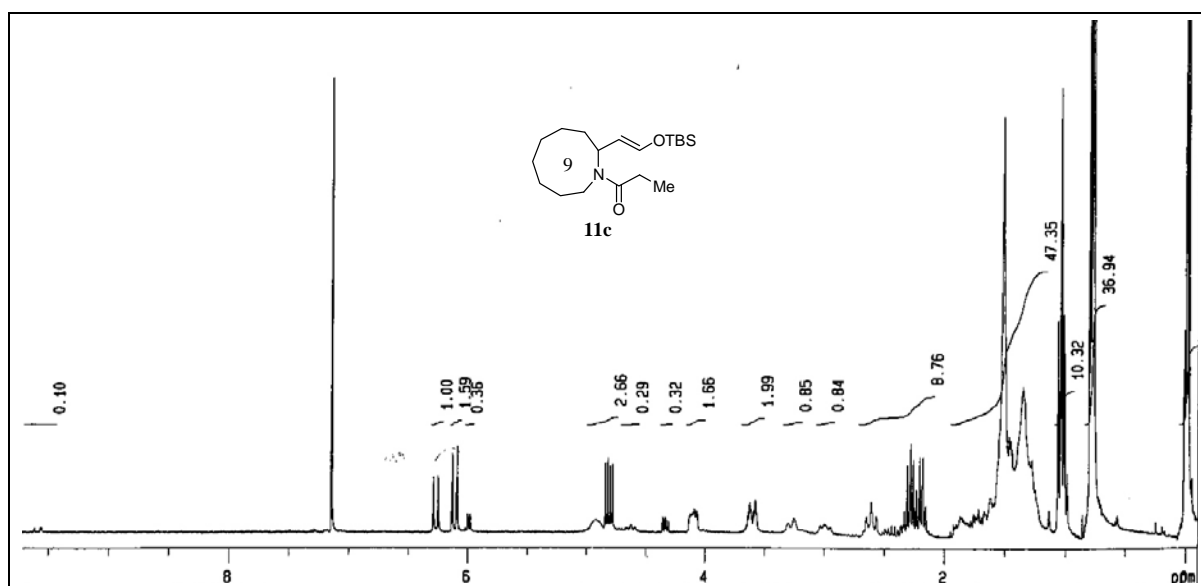

▲ <sup>1</sup>H-NMR (300 MHz, CDCl<sub>3</sub>)

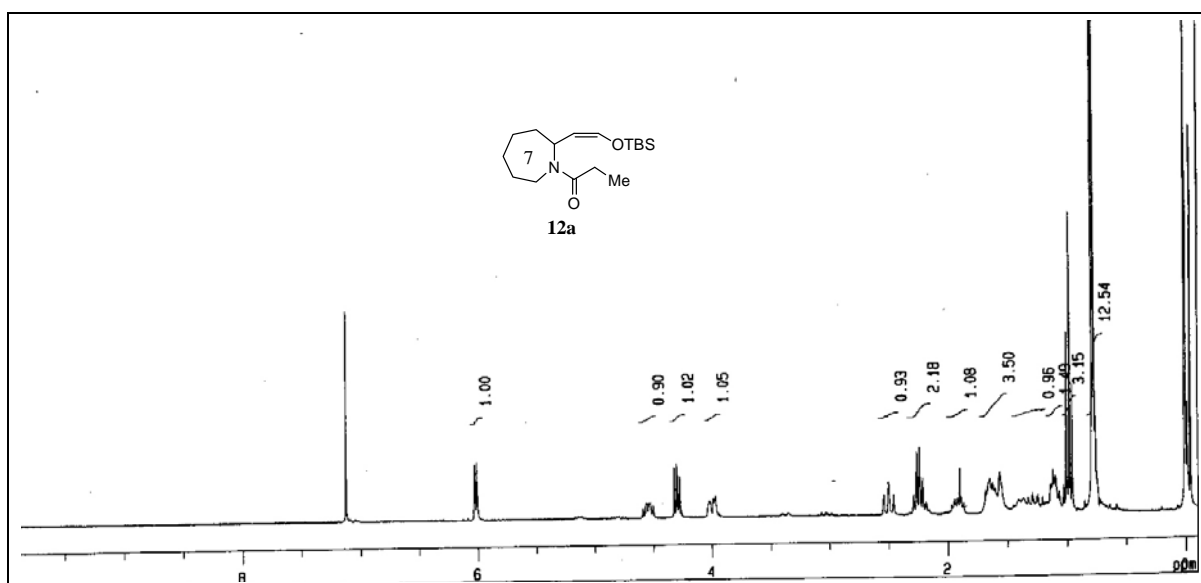

▲ <sup>1</sup>H-NMR (300 MHz, CDCl<sub>3</sub>)

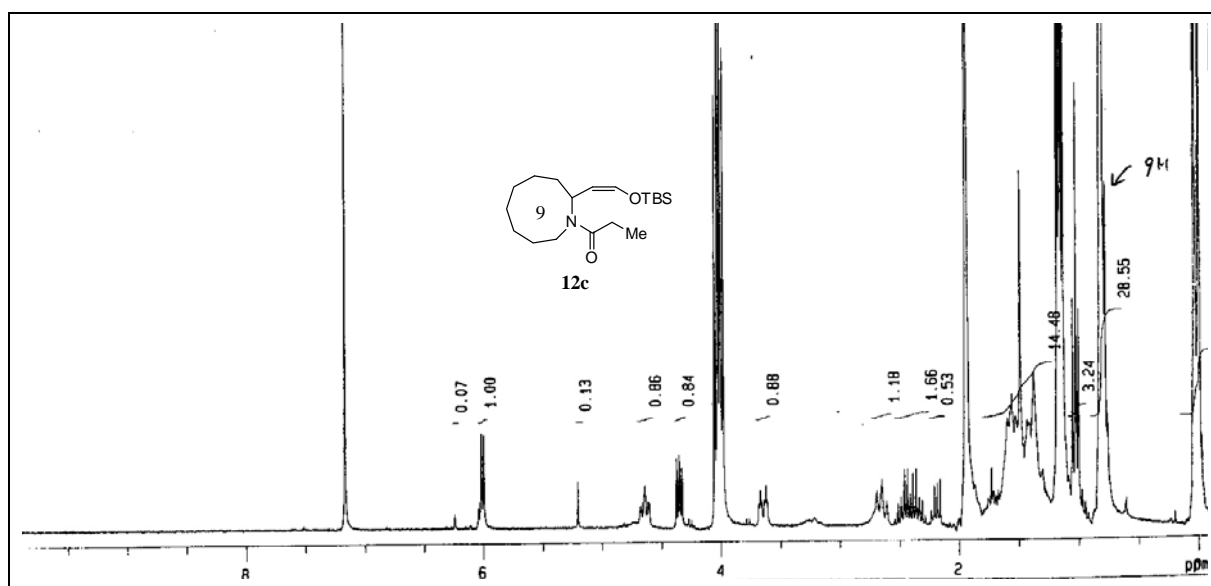

▲  $^1\text{H-NMR}$  (300 MHz,  $\text{CDCl}_3$ )

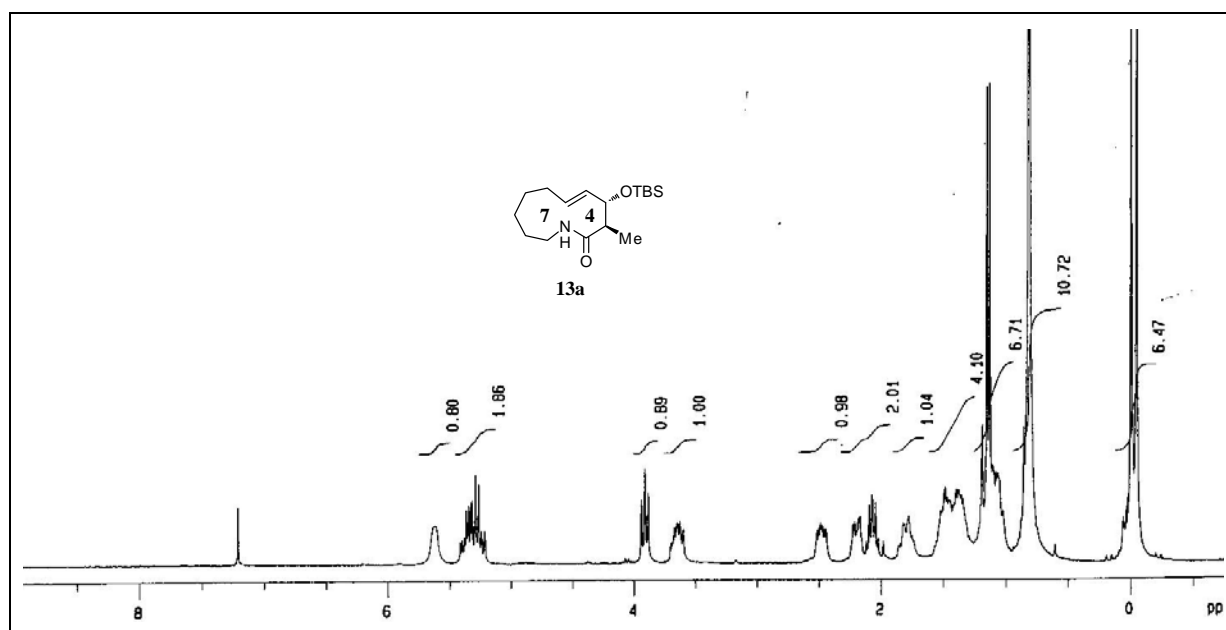

▲  $^1\text{H-NMR}$  (300 MHz,  $\text{CDCl}_3$ )

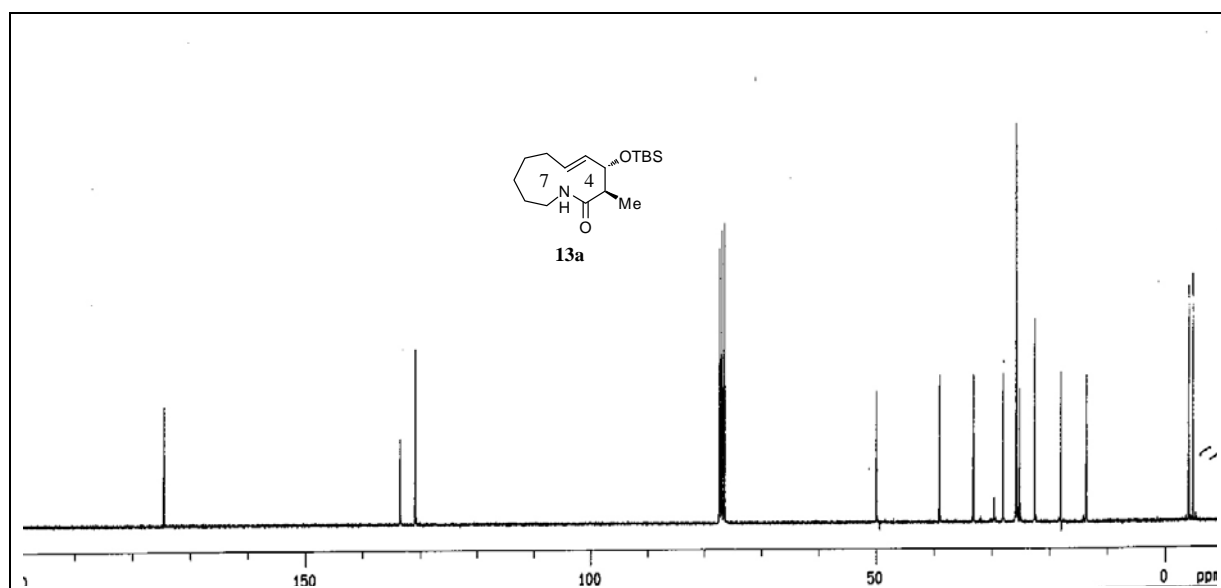

▲  $^{13}\text{C}$ -NMR (75 MHz, CDCl<sub>3</sub>)

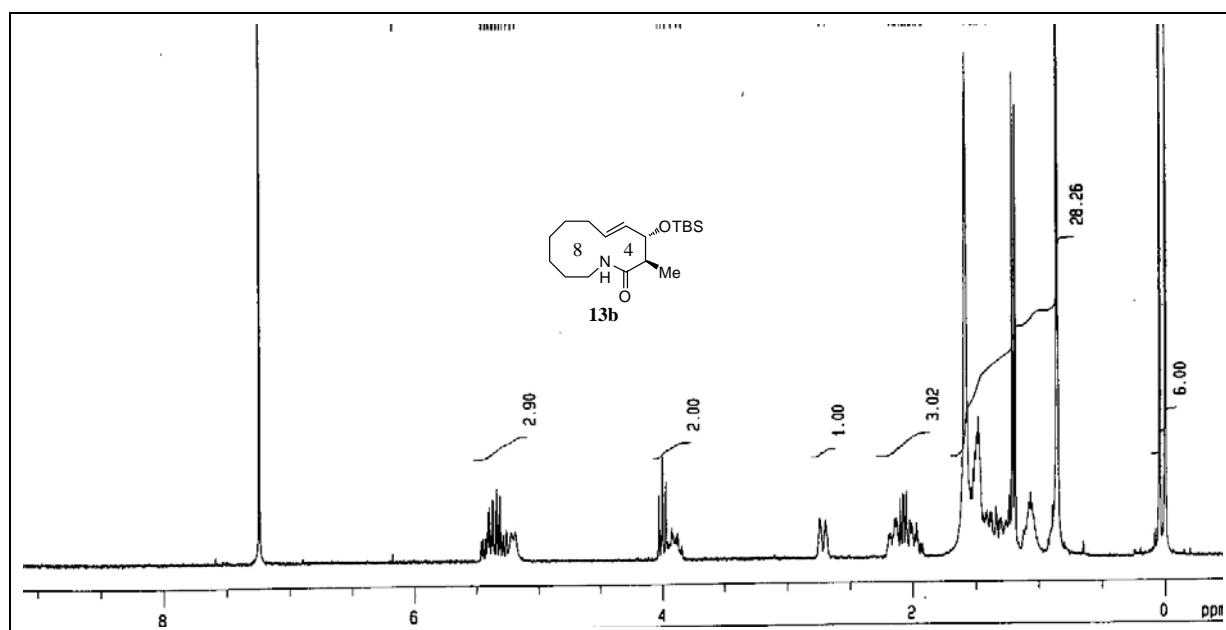

▲  $^1\text{H}$ -NMR (300 MHz, CDCl<sub>3</sub>)

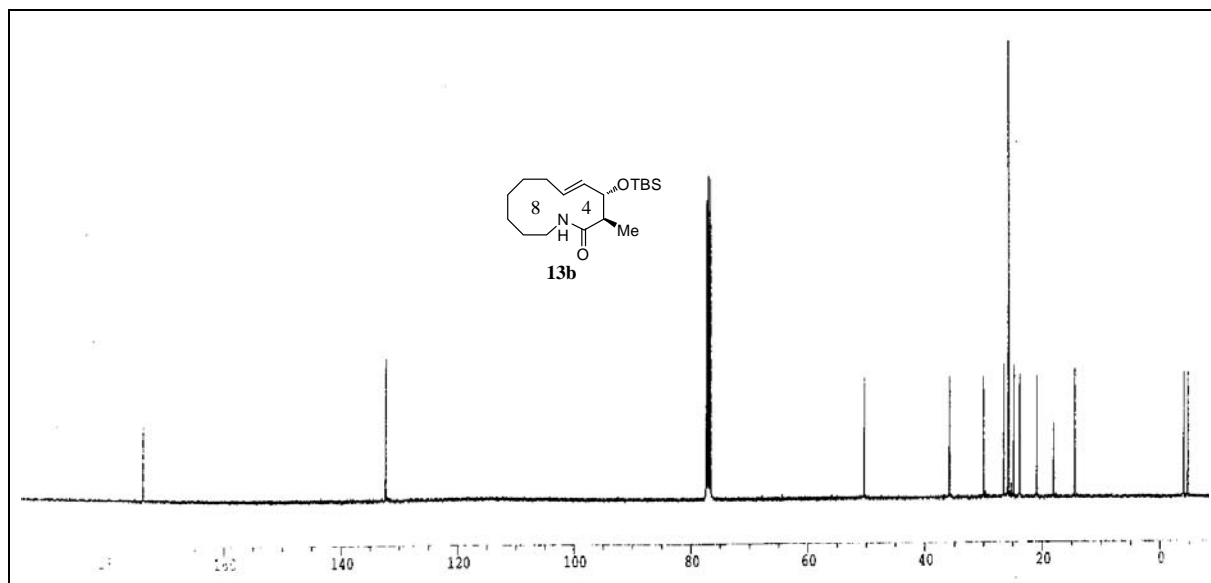

▲  $^{13}\text{C}$ -NMR (100 MHz,  $\text{CDCl}_3$ )

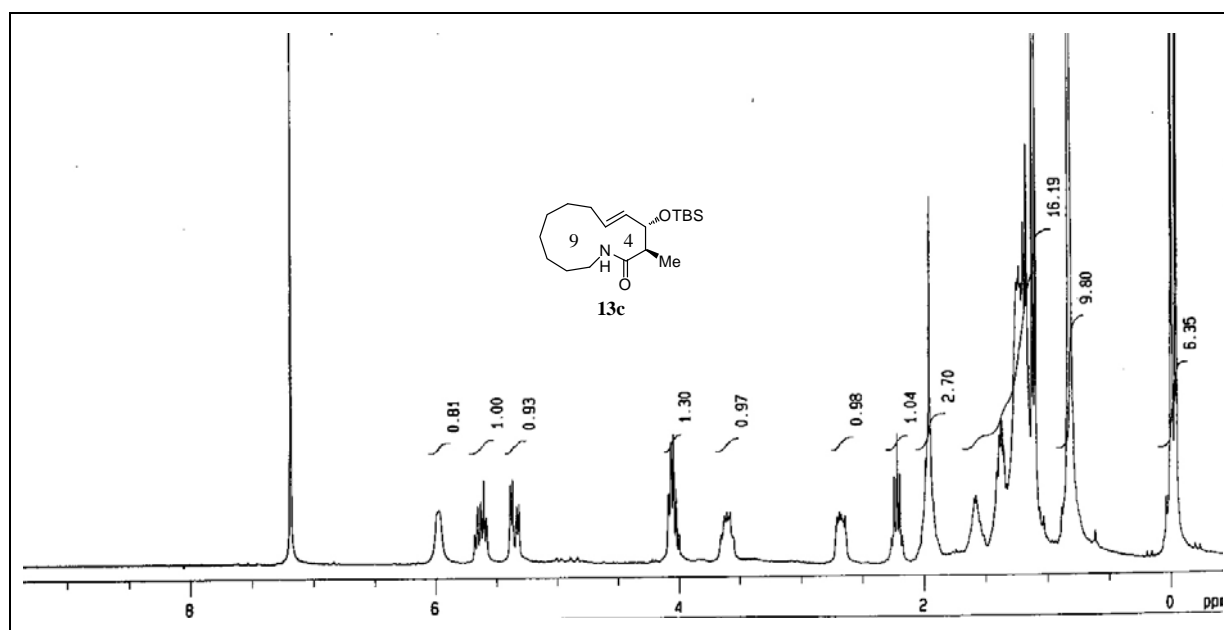

▲  $^1\text{H}$ -NMR (300 MHz,  $\text{CDCl}_3$ )

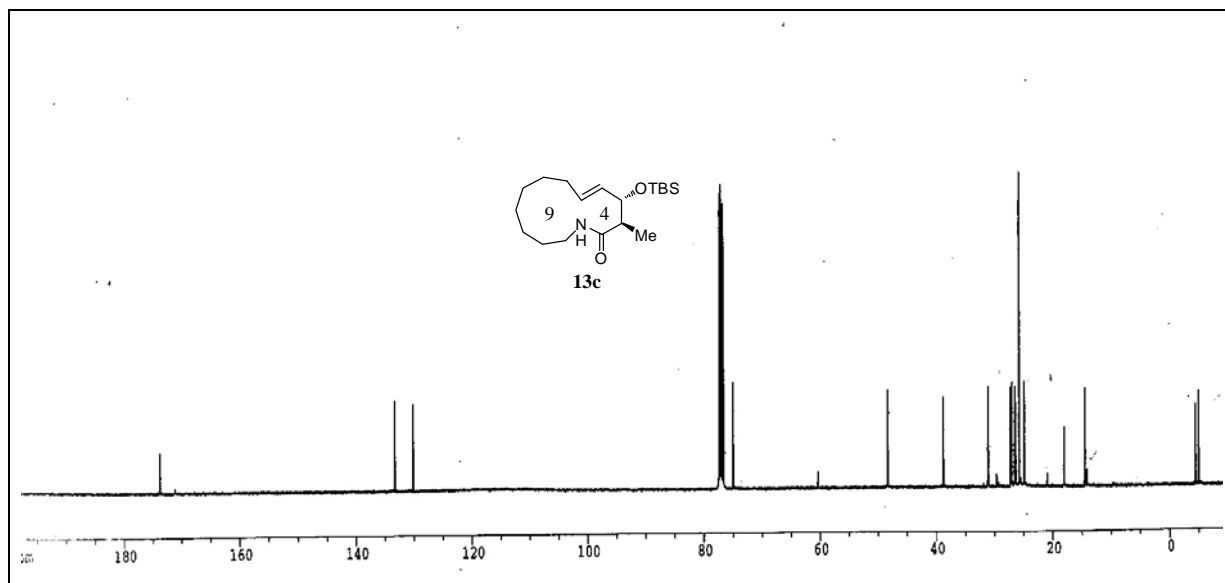

▲  $^{13}\text{C}$ -NMR (100MHz, CDCl<sub>3</sub>)

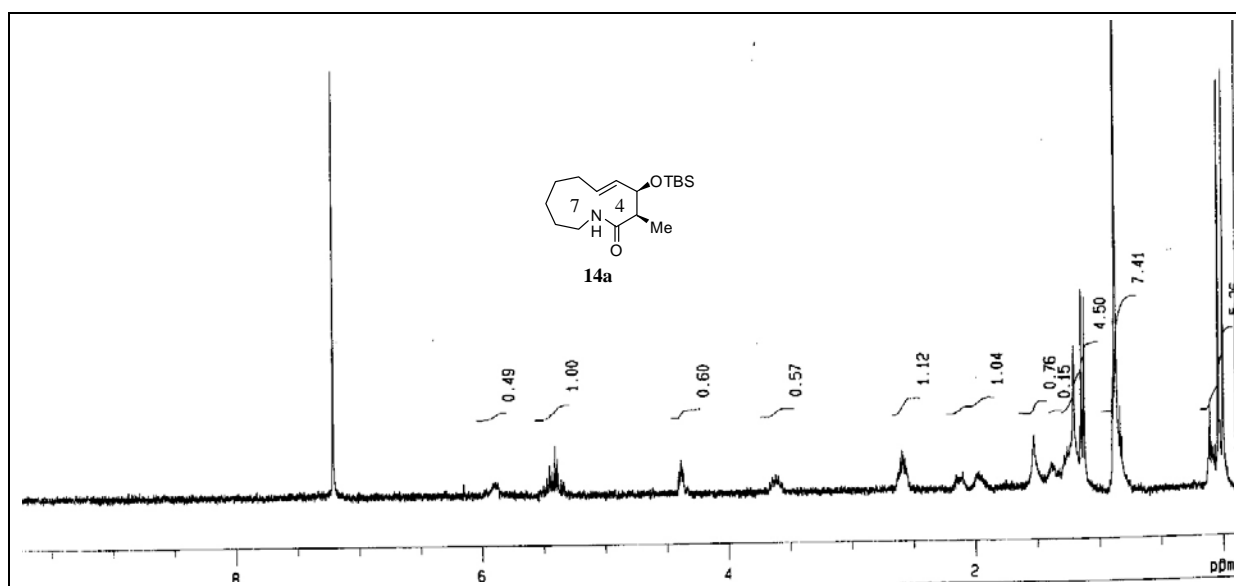

▲  $^1\text{H}$ -NMR (300MHz, CDCl<sub>3</sub>)



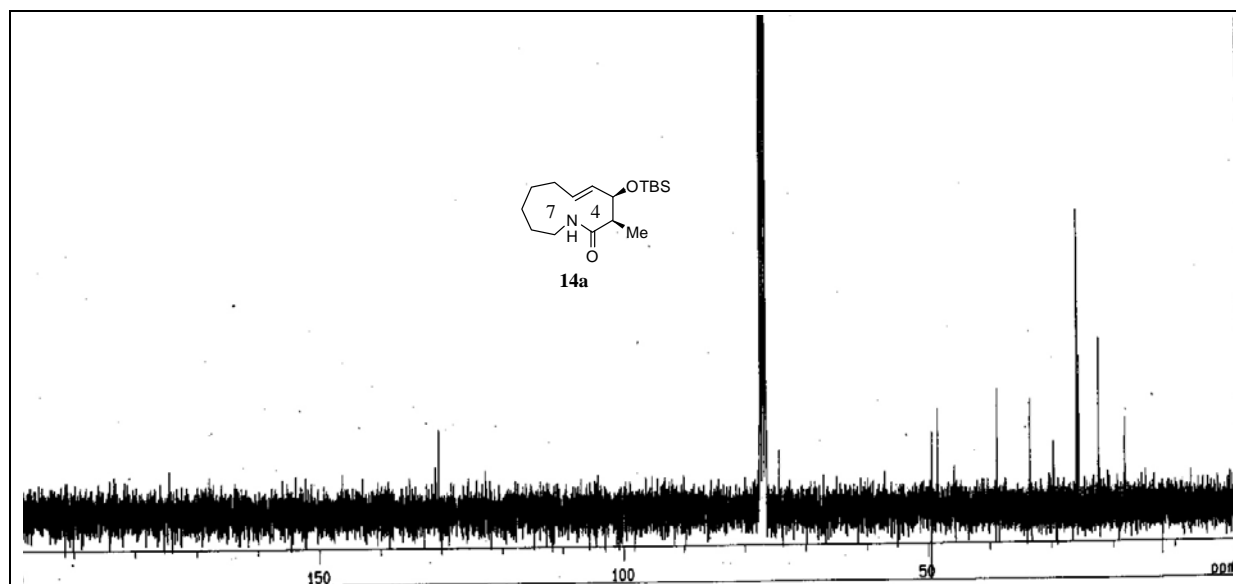

▲  $^{13}\text{C}$ -NMR (75 MHz,  $\text{CDCl}_3$ )

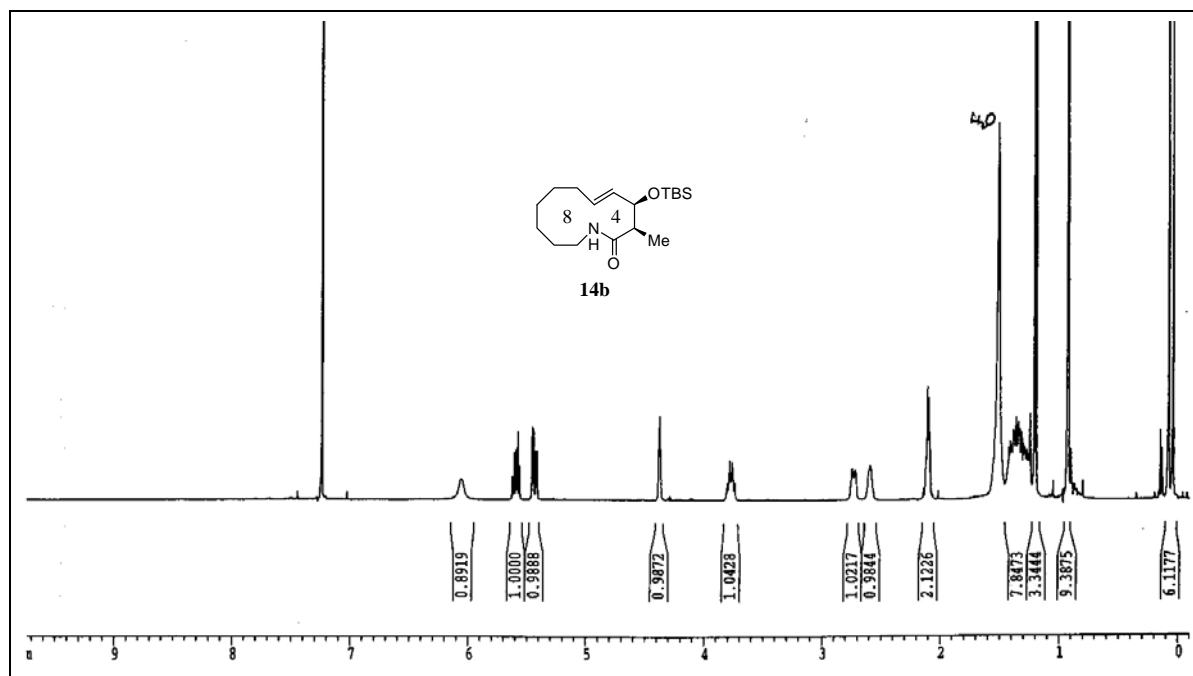

▲  $^1\text{H}$ -NMR (400 MHz,  $\text{CDCl}_3$ )

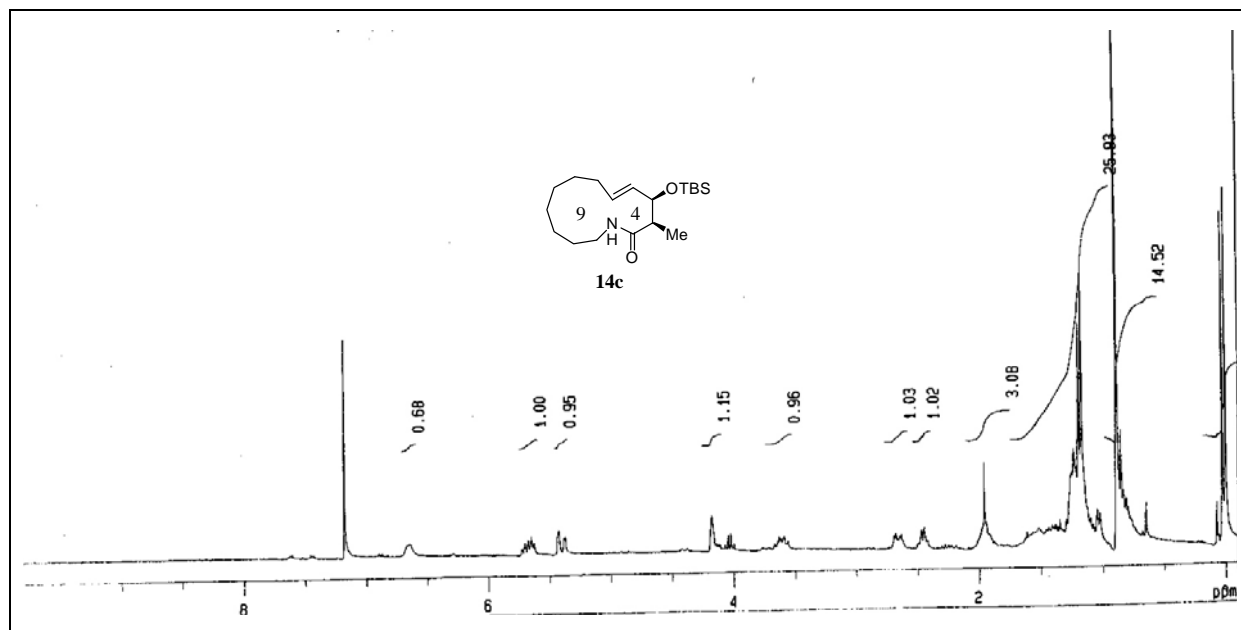

▲ <sup>1</sup>H-NMR (300 MHz, CDCl<sub>3</sub>)

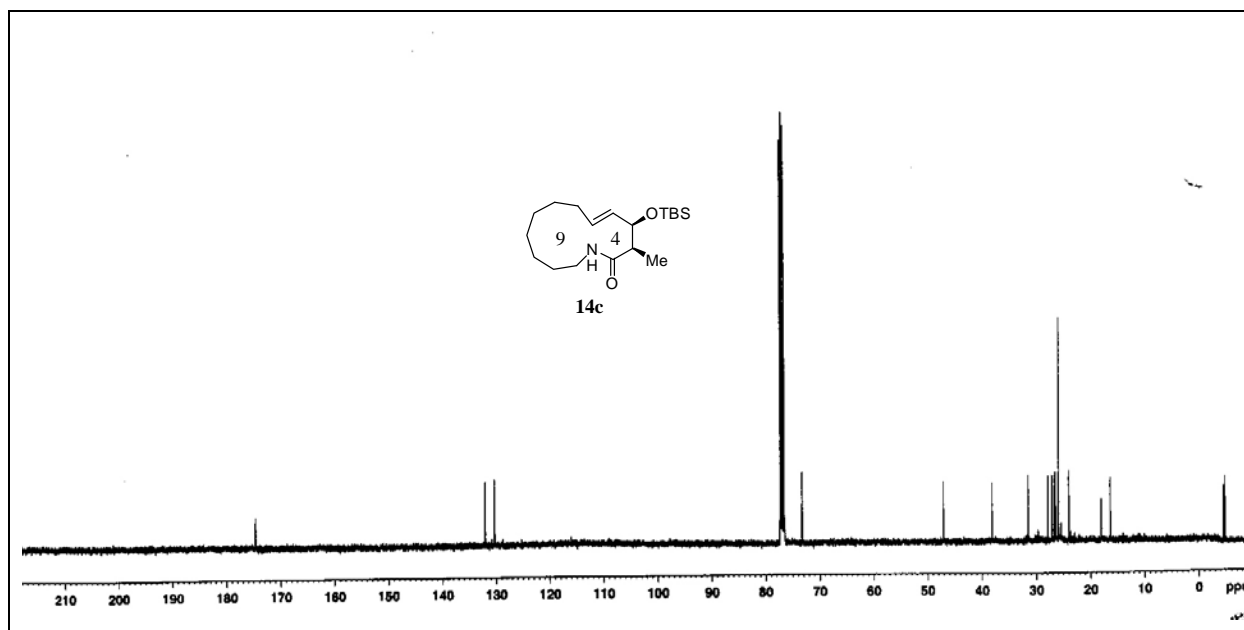

▲ <sup>13</sup>C-NMR (100 MHz, CDCl<sub>3</sub>)

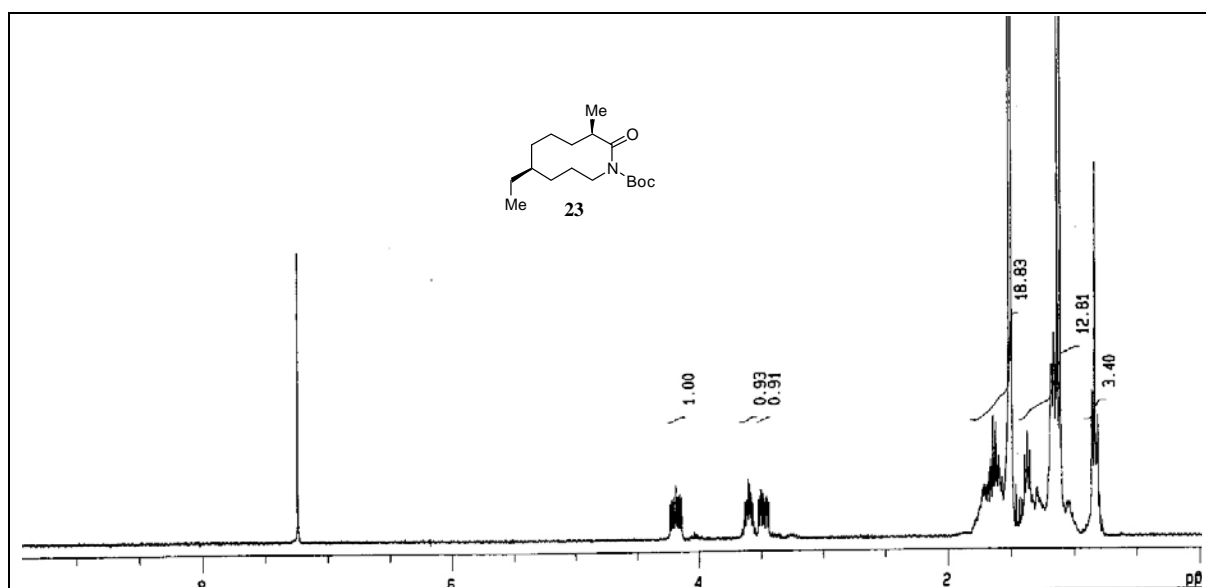

▲ <sup>1</sup>H-NMR (300 MHz, CDCl<sub>3</sub>)

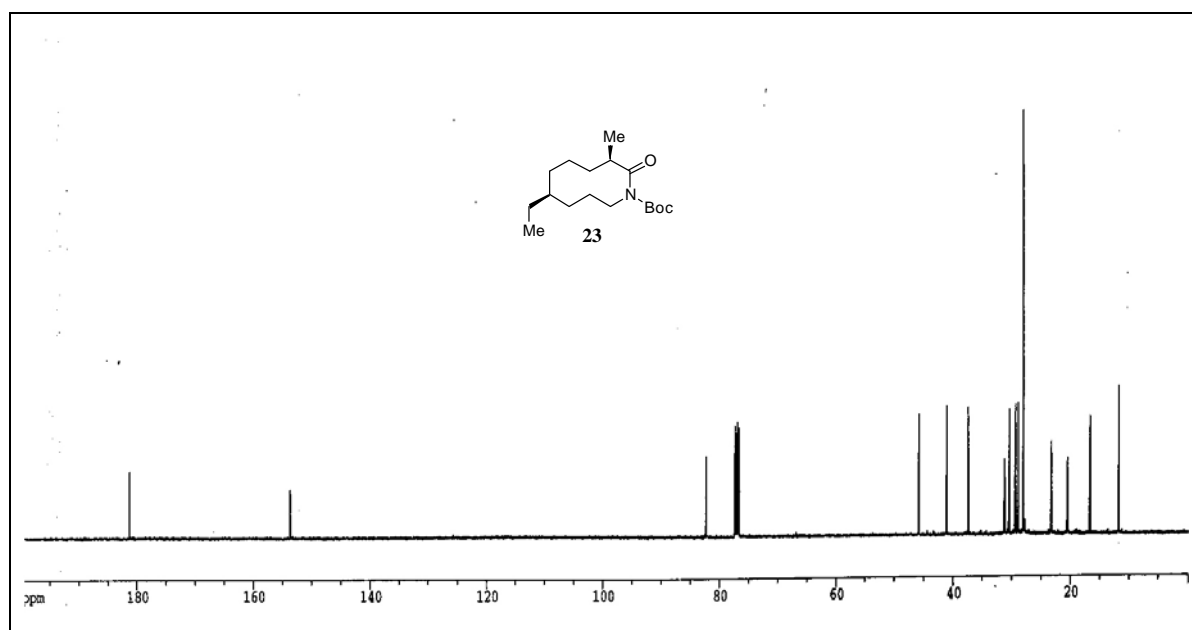

▲ <sup>13</sup>C-NMR (100 MHz, CDCl<sub>3</sub>)

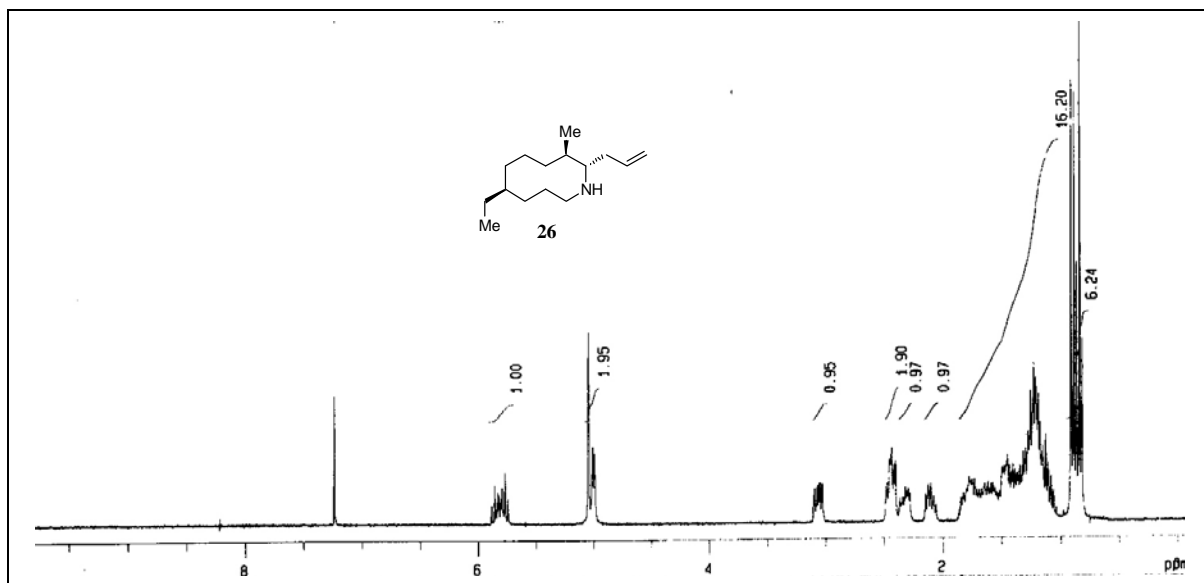

▲ <sup>1</sup>H-NMR (300 MHz, CDCl<sub>3</sub>)

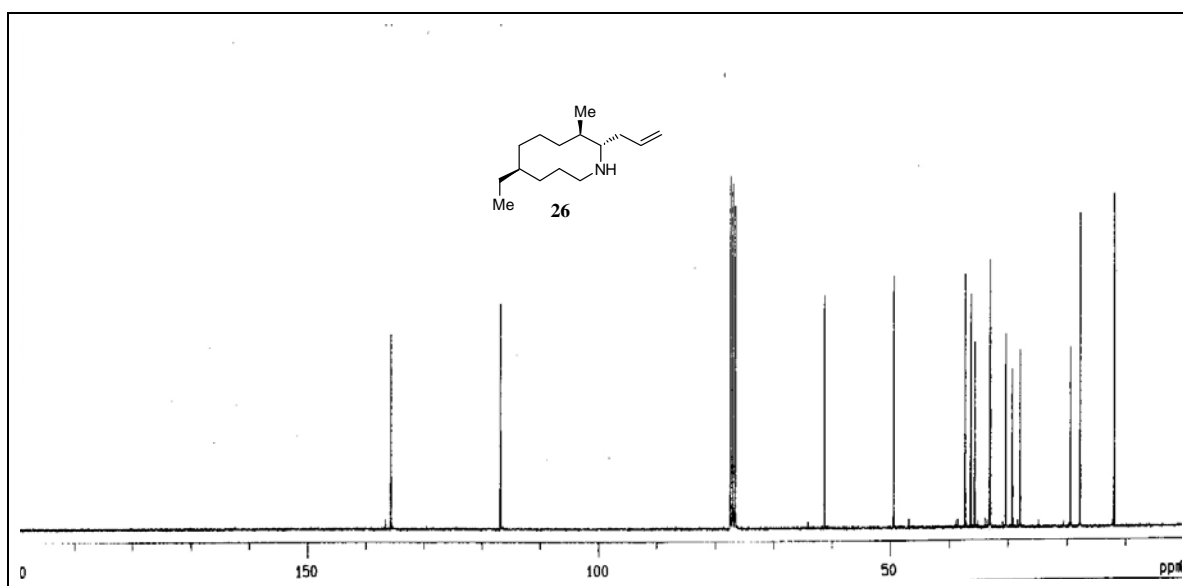

▲ <sup>13</sup>C-NMR (75 MHz, CDCl<sub>3</sub>)

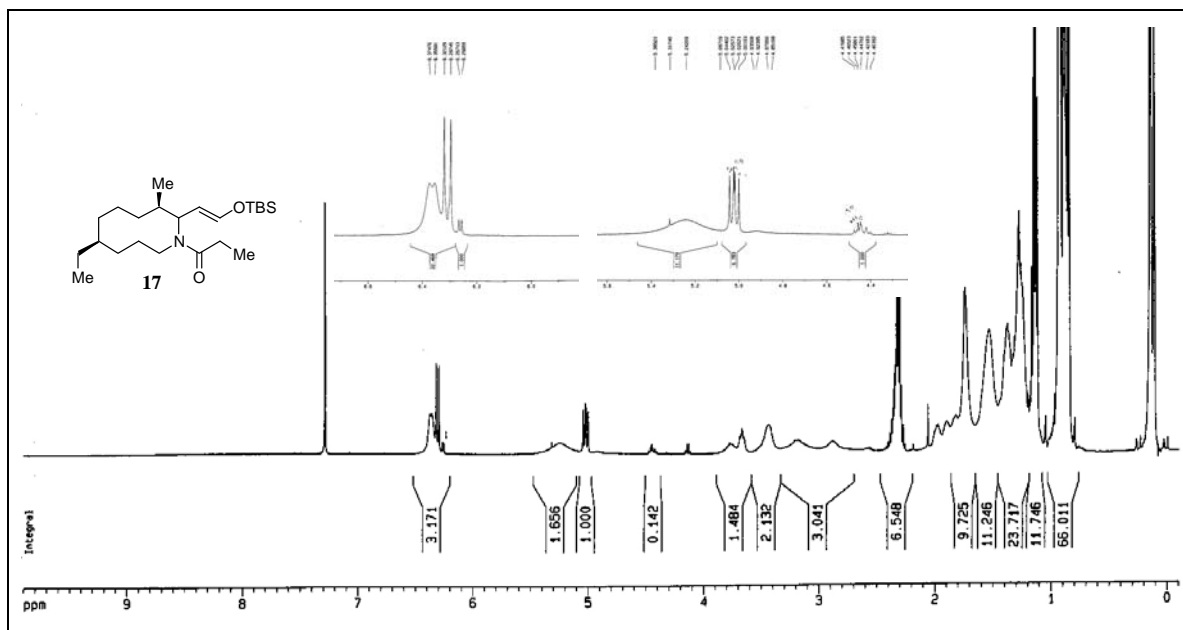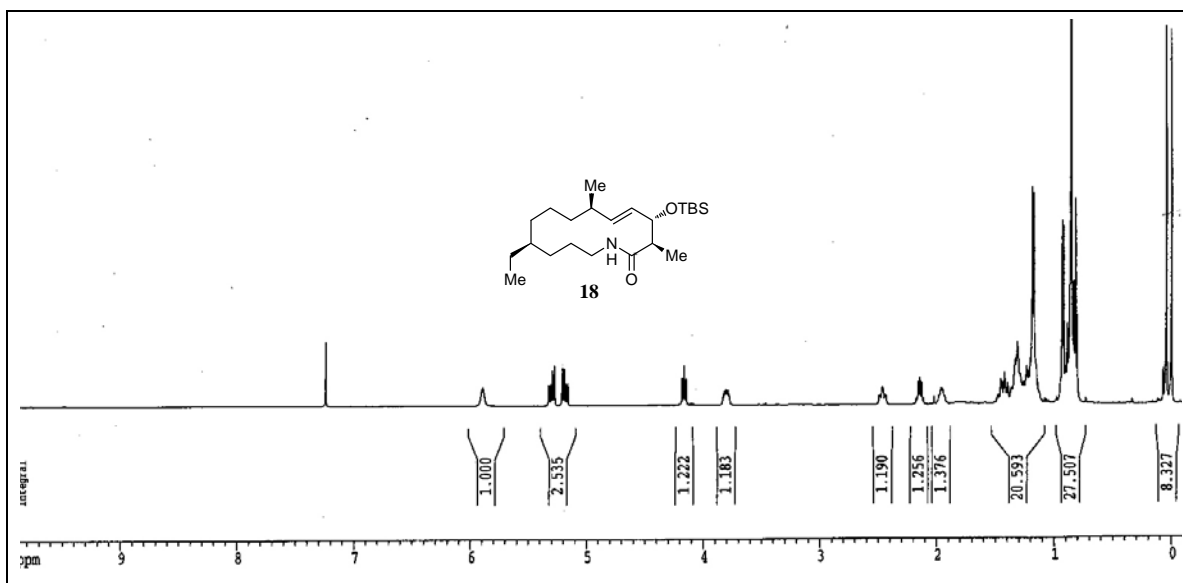

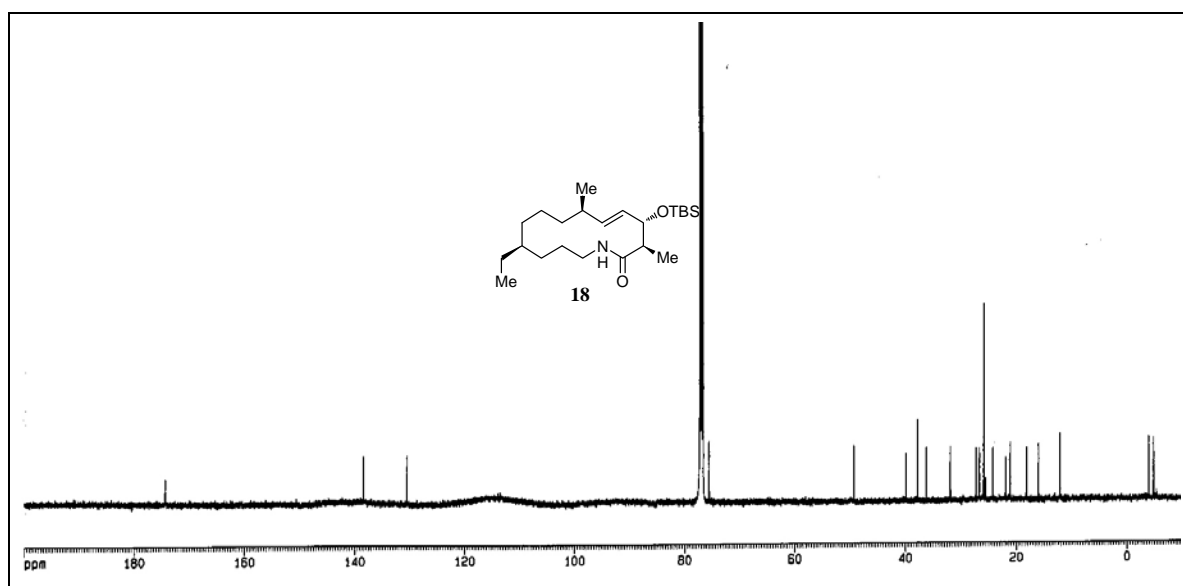

▲ <sup>13</sup>C-NMR (125 MHz, CDCl<sub>3</sub>)

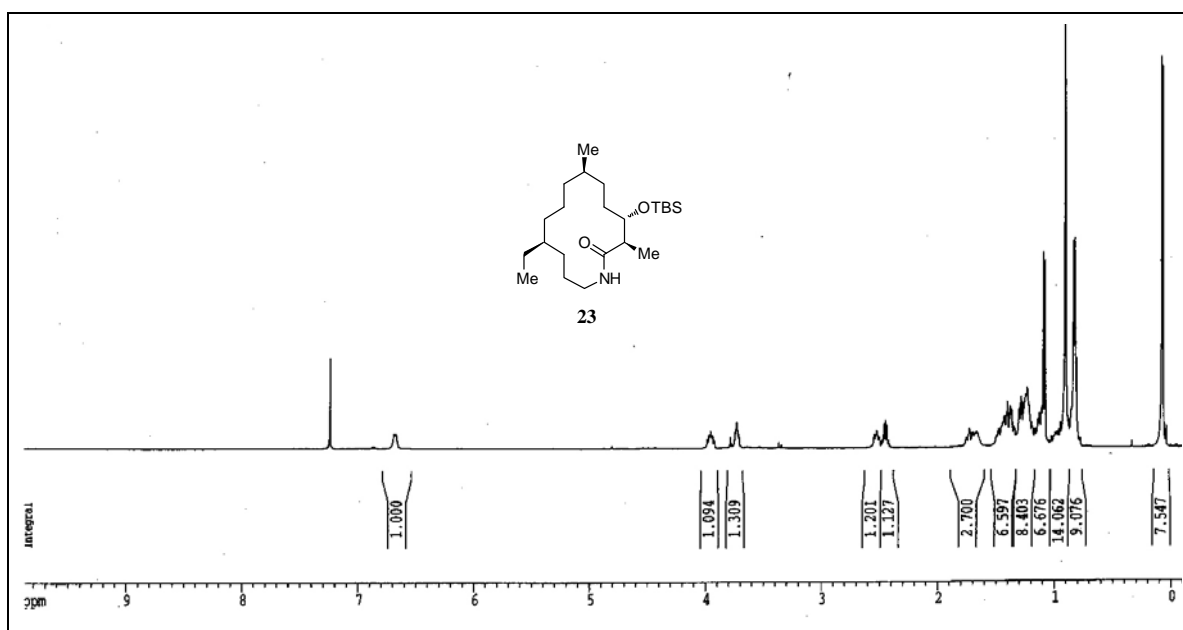

▲ <sup>1</sup>H-NMR (400 MHz, CDCl<sub>3</sub>)

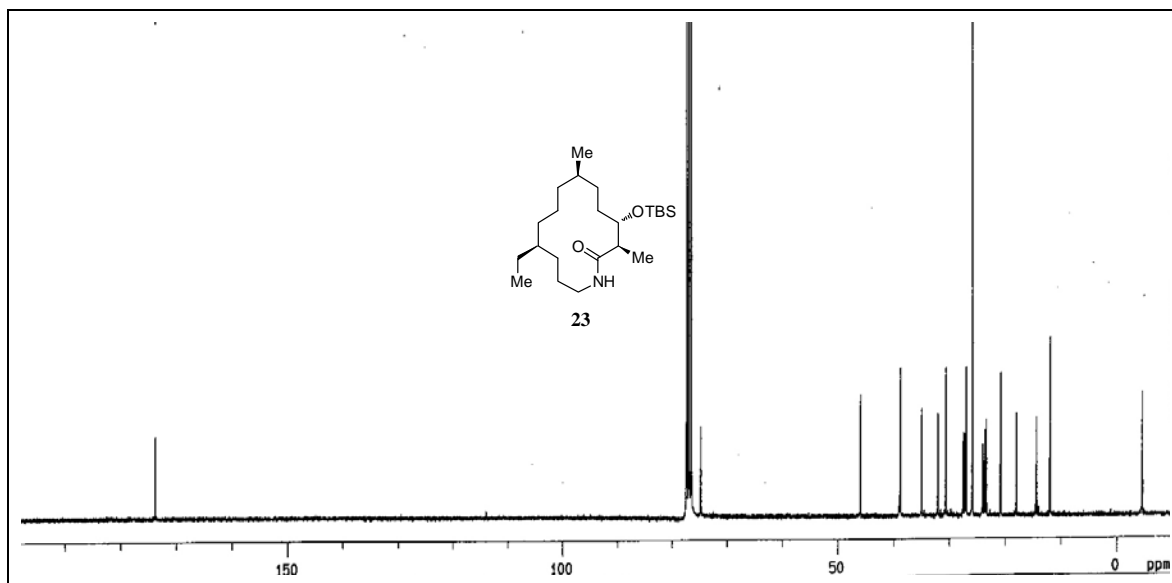

▲  $^{13}\text{C}$ -NMR (100 MHz,  $\text{CDCl}_3$ )

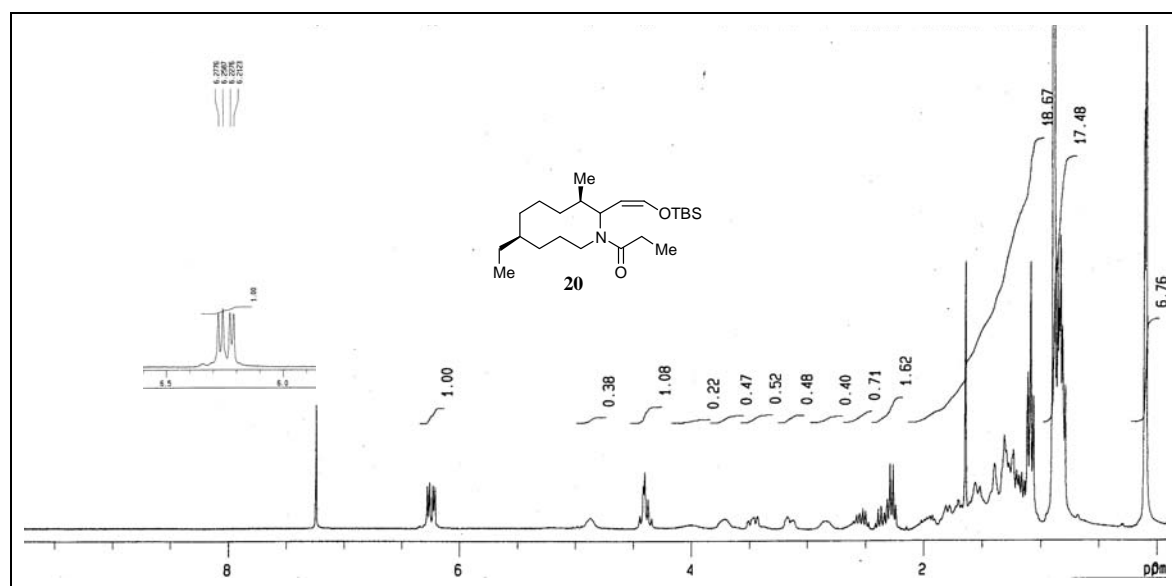

▲  $^1\text{H}$ -NMR (300 MHz,  $\text{CDCl}_3$ )





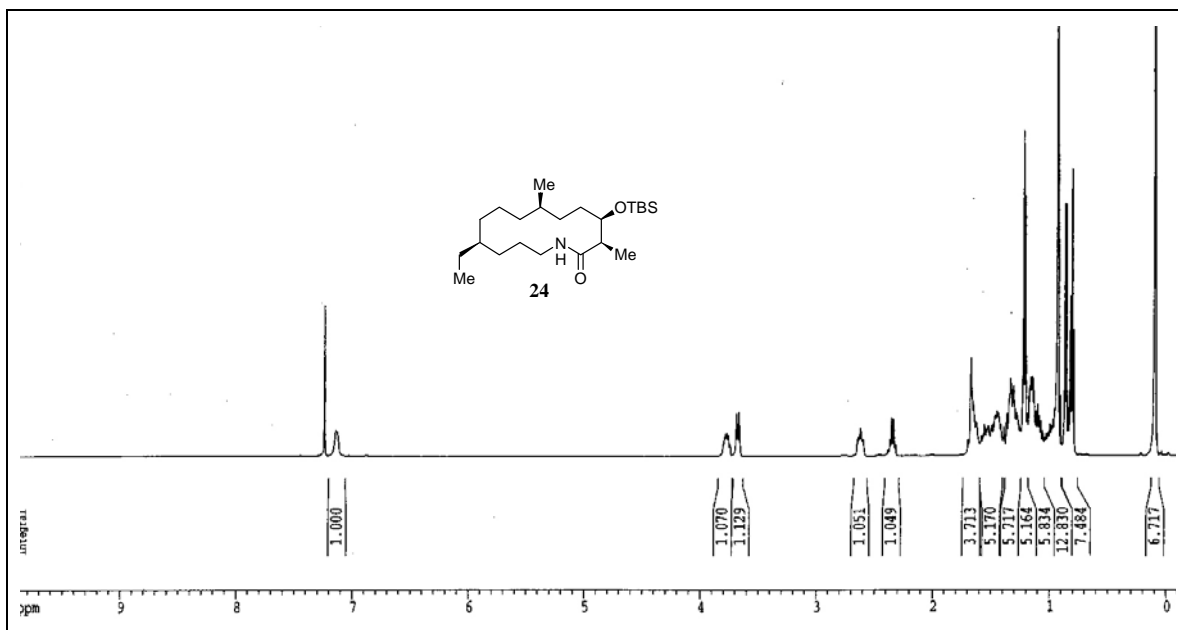

▲  $^1\text{H-NMR}$  (500 MHz,  $\text{CDCl}_3$ )

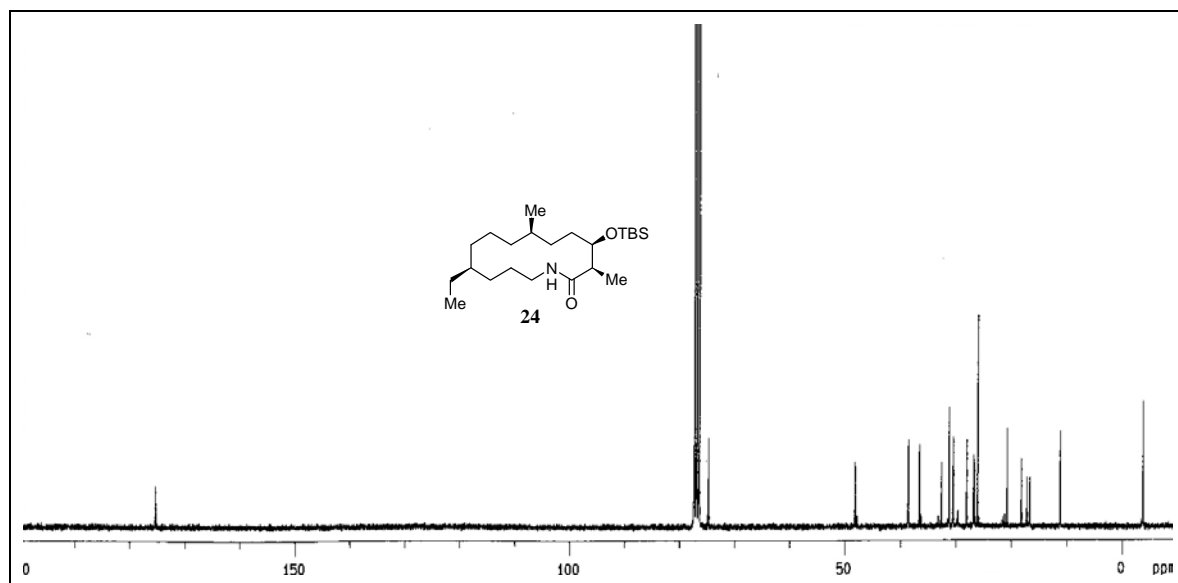

▲  $^{13}\text{C-NMR}$  (75 MHz,  $\text{CDCl}_3$ )



▲  $^{13}\text{C}$ -NMR (75 MHz,  $\text{CDCl}_3 + \text{CD}_3\text{OD}$ )

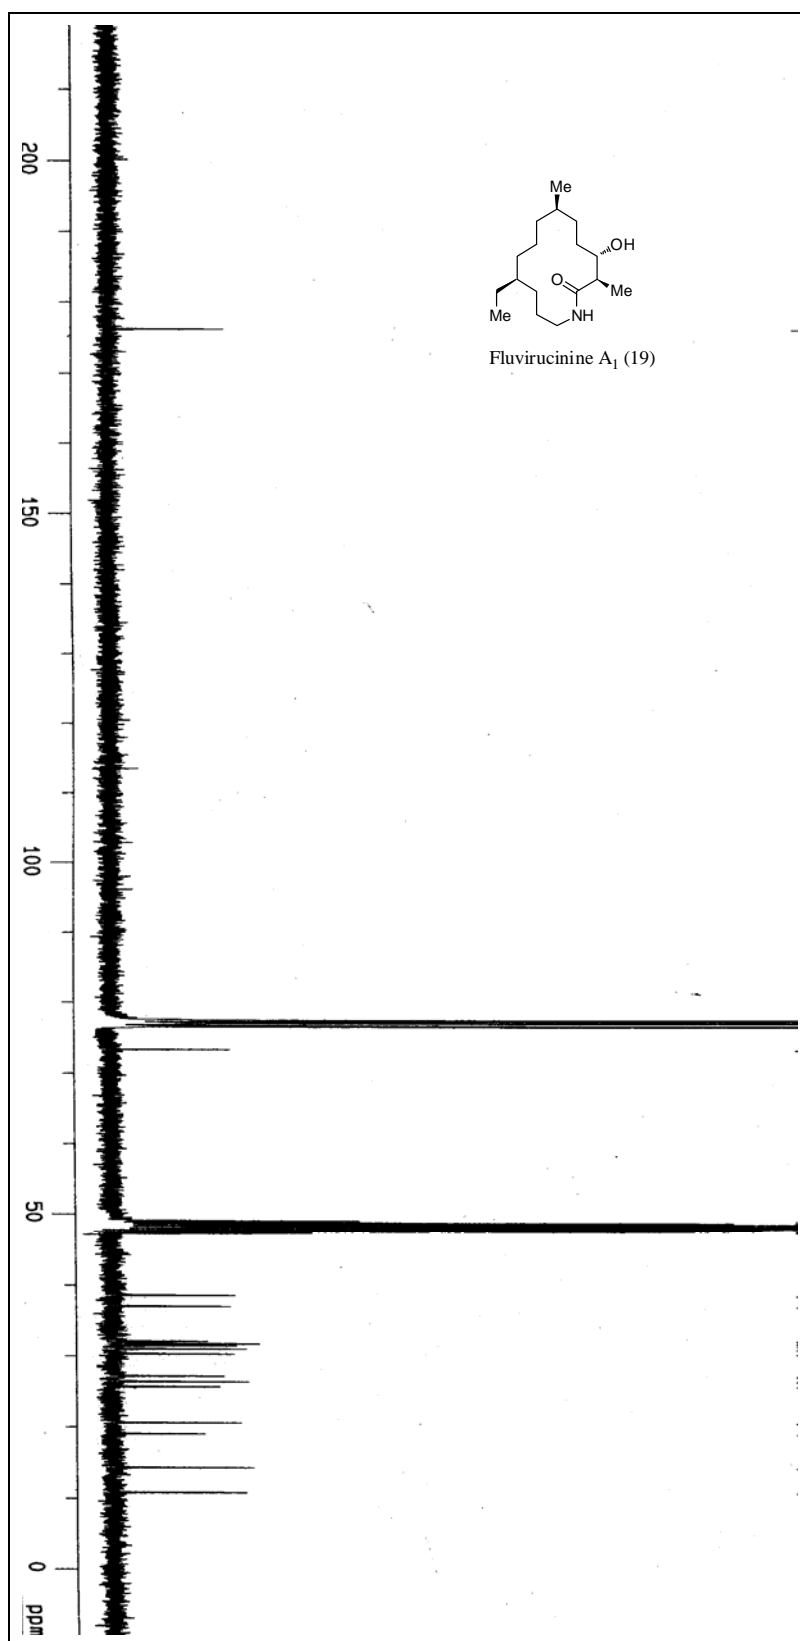

▲  $^1\text{H-NMR}$  (400 MHz,  $\text{CDCl}_3$ )

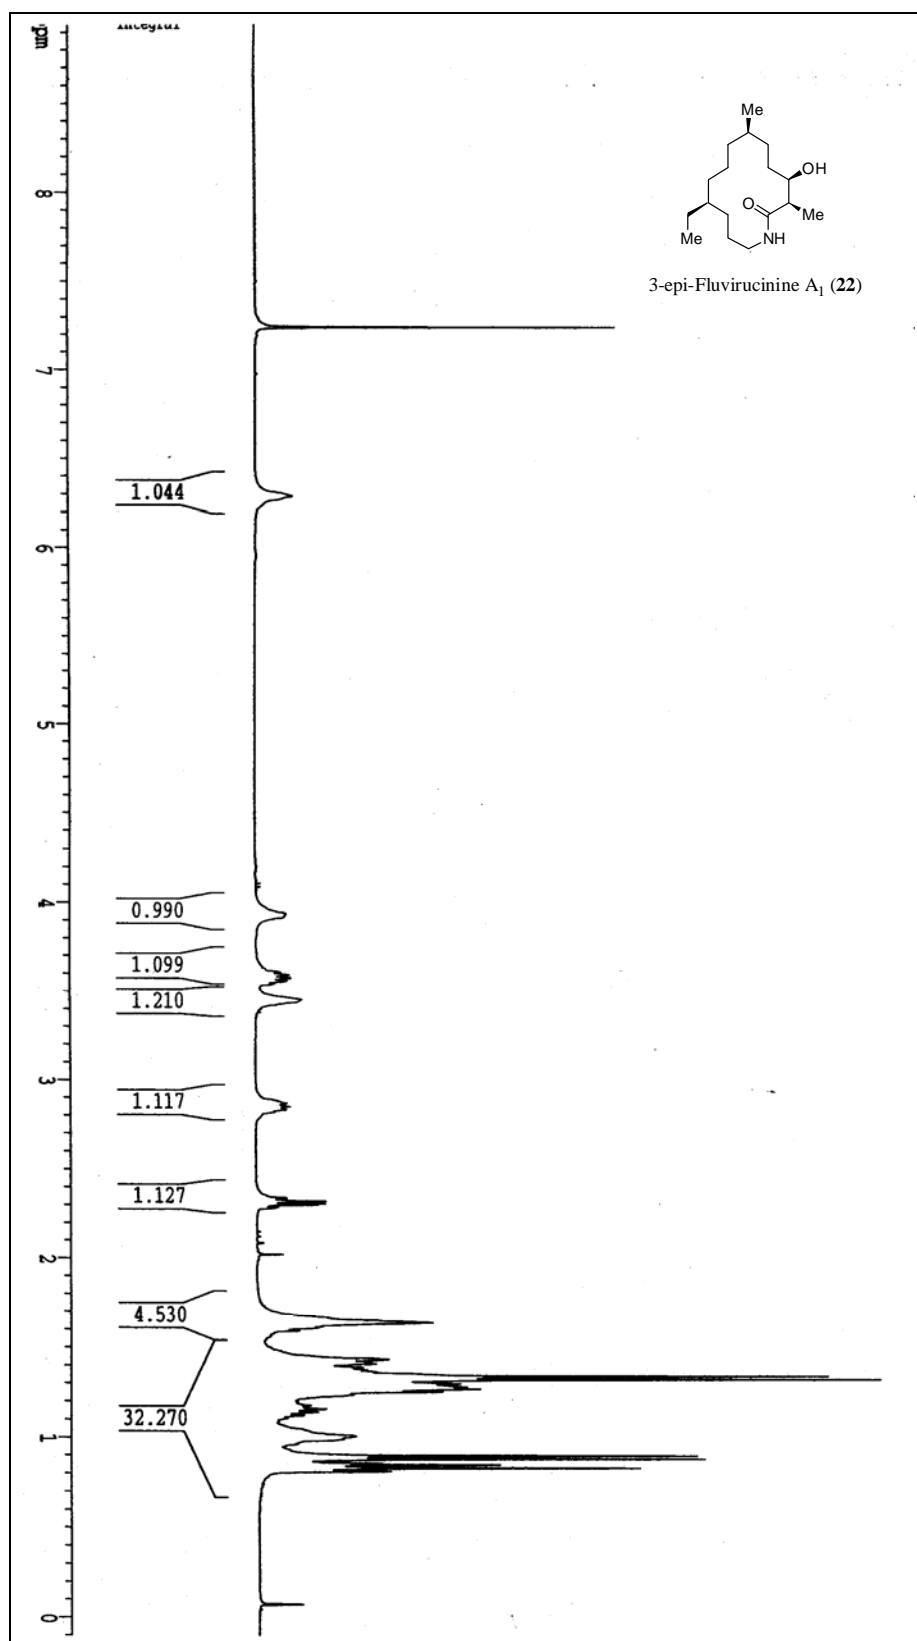

▲  $^{13}\text{C}$ -NMR (75 MHz,  $\text{CDCl}_3$ )

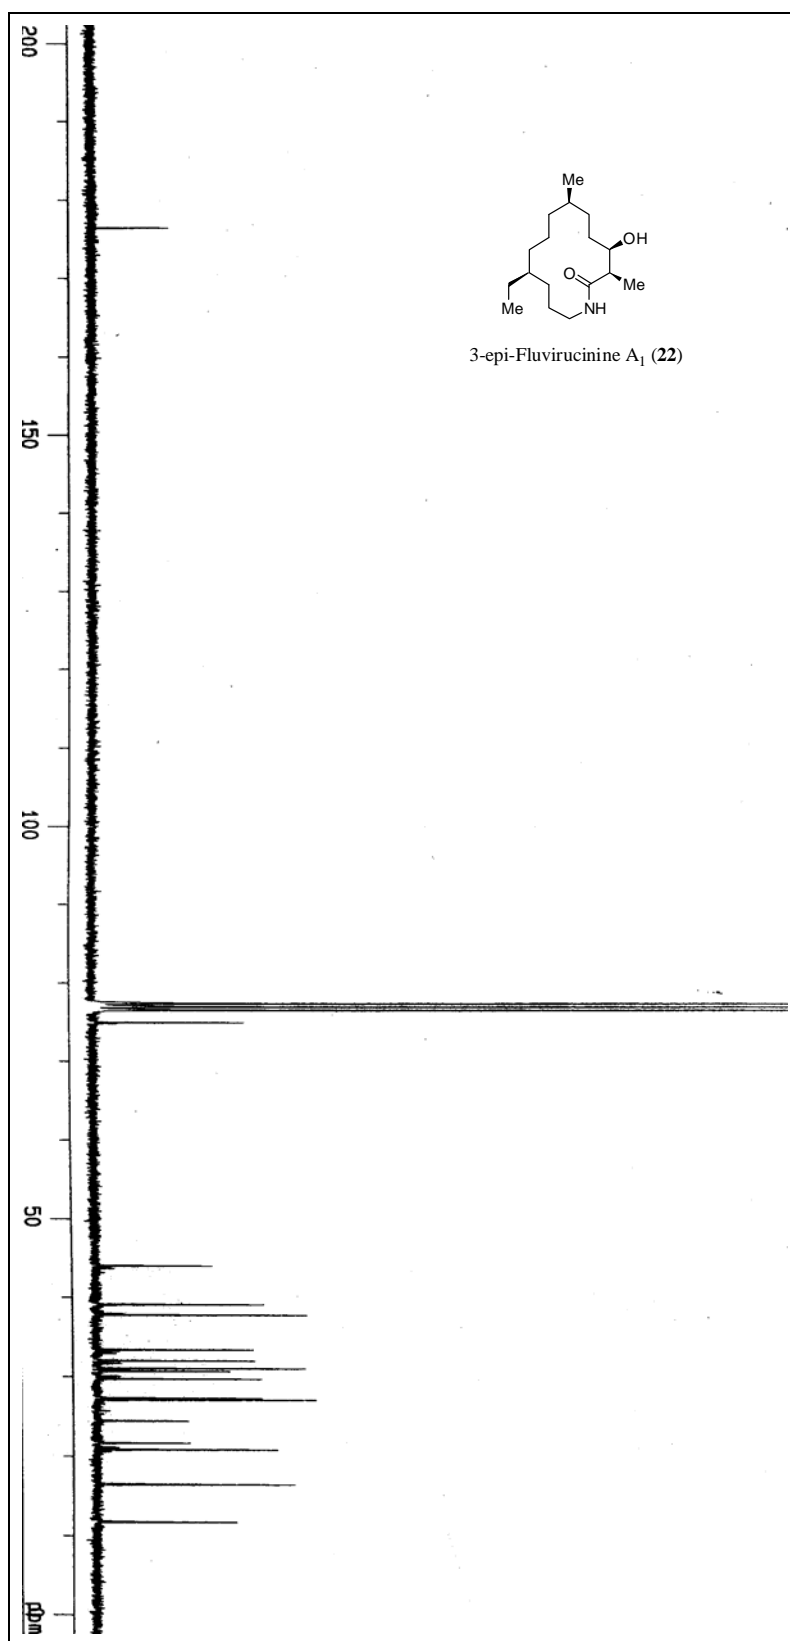

Supplement: c1ob06733h.pdf [file c1ob06733h.pdf]
